# Supplementary material
Source: PubMed Central journal article supplement (PMC10666042)

## Supplementary Online Content

Landi A, Alasnag M, Heg D, et al; MASTER DAPT Investigators. Abbreviated or standard dual antiplatelet therapy by sex in patients at high bleeding risk: a prespecified secondary analysis of a randomized clinical trial. *JAMA Cardiol*. Published online November 22, 2023. doi:10.1001/jamacardio.2023.4316

**eAppendix.** Committees and Investigators

**eMethods.** Additional Information

**eTable 1.** Details on DAPT and SAPT at 1-, 3-, 6- and 12-mo study visit

**eTable 2.** Baseline Characteristics According to Sex

**eTable 3.** Procedural Characteristics According to Sex

**eTable 4.** Procedural Characteristics by Randomized Antiplatelet Regimen and Sex

**eTable 5.** Treated Lesion Characteristics According to Sex and Randomly Allocated APT Regimen

**eTable 6.** Unadjusted and Adjusted Clinical Outcomes at 11 mo Post Randomization (12-mo Follow-Up) in Male and Female Patients

**eTable 7.** Clinical Outcomes at 11 mo After Randomization (12-mo Follow-Up) in Male and Female Patients Presenting With ACS

**eTable 8.** Clinical Outcomes at 11 mo After Randomization (12-mo Follow-Up) in Male and Female Patients Presenting With ACS or Who Had Complex PCI

**eTable 9.** Clinical Outcomes at 11 mo After Randomization (12-mo Follow-Up) in Male and Female Patients With Clinical Indication for 12-mo OAC

**eTable 10.** Clinical Outcomes at 11 mo After Randomization (12-mo Follow-Up) in Male and Female Patients Without Clinical Indication for 12-mo OAC

**eFigure 1.** CONSORT Diagram of the MASTER DAPT Study

**eFigure 2.** Antiplatelet Therapy Since Randomization in Male Patients Without and With Clinical Indication for Oral Anticoagulation (OAC) Therapy

**eFigure 3.** Antiplatelet Therapy Since Randomization in Female Patients Without and With Clinical Indication for Oral Anticoagulation (OAC) Therapy

**eFigure 4.** Kaplan Meier Curves for All-Cause Mortality, Myocardial Infarction, Stroke, and BARC Type 3 or 5 Bleeding

This supplementary material has been provided by the authors to give readers additional information about their work.

## eAppendix. Committees and Investigators

### Executive committee

|                                               |                                    |
|-----------------------------------------------|------------------------------------|
| Coprincipal Investigator                      | M. Valgimigli                      |
| Coprincipal Investigator                      | P.C. Smits                         |
| Sponsor Representative                        | G.A. Van Es until June 1, 2018     |
| Sponsor Representative                        | From June 1 2018, G.B.W.E. Vos     |
| Sponsor Representative                        | From October 16, 2020, E. Spitzer  |
| Principal Investigators                       | P. Vrancks; B. Chevalier; Y. Ozaki |
| Clinical Research Organization Representative | M.C. Morice                        |
| Cardiologists                                 | Y. Onuma; E. Frigoli               |
| Bern University Hospital Representative       | A. Frenk                           |
| Biostatisticians                              | P. Jüni; J. Tijssen                |
| Terumo Representative (nonvoting member)      | D. Paunovic                        |

### Steering committee

#### National Lead Investigators

|                                            |                  |
|--------------------------------------------|------------------|
| Bangladesh, India                          | M.S. Ajit        |
| Kingdom of Bahrain, Saudi Arabia           | M. Alasnag       |
| Belgium                                    | J. Bartunek      |
| France                                     | B. Chevalier     |
| Italy                                      | A. Colombo       |
| United Kingdom                             | D. Hildick-Smith |
| Portugal, Spain                            | A. Iñiguez       |
| Austria, Denmark, Estonia, Germany, Sweden | F. Mahfoud       |
| Israel                                     | R. Kornowski     |
| Bulgaria, Czech Republic, Hungary, Poland  | M. Lesiak        |
| Singapore, South Korea, Vietnam            | P.J. Ong         |
| Japan                                      | Y. Ozaki         |
| Argentina                                  | A.E. Rodriguez   |
| Switzerland                                | M. Roffi         |
| Australia                                  | C. Schultz       |
| Macedonia, Serbia                          | G. Stankovic     |
| The Netherlands                            | P. Tonino        |

#### Top enrollers

|                                                                   |                  |
|-------------------------------------------------------------------|------------------|
| Inselspital, Bern, Switzerland                                    | Aris Moschovitis |
| North Estonia Medical Center, Tallinn, Estonia                    | Peep Laanmets    |
| Interventional Cardiology Unit, Policlinico Casilino, Rome, Italy | Michael Donahue  |

### Data monitoring committee

|                 |             |
|-----------------|-------------|
| Chair           | M. Bertrand |
| Biostatistician | S. Pocock   |
| Cardiologist    | P. Urban    |

### Clinical events committee

|               |                                                         |
|---------------|---------------------------------------------------------|
| Chair         | S. Leonardi                                             |
| Cardiologists | C. Hanet; R. Lopes; E.P. McFadden; P. Radke; E. Spitzer |
| Neurologist   | R. O. Roine                                             |

### Safety reporting group (Cardialysis, Rotterdam, The Netherlands)

Boudijn Ladan (Safety Specialist), Laura van der Waal (Safety Assistant), Yvonne Engelbrecht (Safety Assistant), Fred Paddenburg (Safety Manager), Ben Ren, M.D., Ph.D. (Medical Reviewer).

### CEC management group (Cardialysis, Rotterdam, The Netherlands)

Ingrid de Zwart (Data Manager), Liliame Elshout (Data Manager), Judith Jonk (Data Manager), Tessa Rademaker-Havinga (Statistician).

## Project management

Ria van Vliet (Project Manager, ECRI, Rotterdam, The Netherlands). Marie-Claude Morice (Medical Director, CERC, France), Phani Krishna Kondamudi (Clinical Project Leader, CERC, France), Laure Morsiani (Clinical Operations Manager, CERC, France), Ute Windhövel (Regulatory Affairs Manager, CERC, France). Anita van der Wal (Project Manager, Cardialysis, Rotterdam, the Netherlands), Chantal Bakker (Project Manager, Cardialysis, Rotterdam, The Netherlands). Kazuhiro Minagawa (Project Manager, CVQuest, Tokyo, Japan).

## Countries, investigators, and numbers of patients enrolled

| Country    | Site name                                                      | Principal investigator                                        | Patients randomised (n=4579) | Patients consented but not randomised (n=625) |
|------------|----------------------------------------------------------------|---------------------------------------------------------------|------------------------------|-----------------------------------------------|
| Argentina  |                                                                |                                                               | 16                           | 1                                             |
|            | Buenos Aires, Otamendi Hospital                                | Dr Juan Mieres                                                | 8                            |                                               |
|            | Buenos Aires, Instituto Cardiovascular de Buenos Aires         | Dr Fernando Cura                                              | 5                            | 1                                             |
|            | Buenos Aires, Clinica IMA                                      | Dr Carlos Fernandez-Pereira                                   | 3                            |                                               |
| Australia  |                                                                |                                                               | 142                          | 19                                            |
|            | Perth, Royal Perth Hospital-Cardiology Research                | Prof. Carl Schultz                                            | 66                           | 7                                             |
|            | Wollongong, Wollongong Hospital                                | Dr Astin Lee                                                  | 55                           | 6                                             |
|            | Sydney, Prince of Wales Hospital                               | Dr Nigel Jepson                                               | 8                            | 2                                             |
|            | Fitzroy, St Vincent Hospital                                   | Prof. Robert Whitbourn                                        | 7                            |                                               |
|            | Chermside, The Prince Charles Hospital                         | Dr Owen Christopher Raffel                                    | 6                            | 4                                             |
| Austria    |                                                                |                                                               | 44                           | 11                                            |
|            | Vienna, Wilhelminenspital                                      | Prof. Kurt Huber                                              | 29                           | 9                                             |
|            | Vienna, Rudolfstiftung Hospital                                | Prof. Franz Weidinger                                         | 15                           | 2                                             |
| Bangladesh | Dhaka, National Heart Foundation Hospital & Research Institute | Prof. Fazila-Tun-Nesa Malik                                   | 39                           | 1                                             |
| Belgium    |                                                                |                                                               | 302                          | 51                                            |
|            | Hasselt, Jessa Ziekenhuis                                      | Prof. Pascal Vranckx                                          | 91                           | 14                                            |
|            | Bonheiden, Imelda Ziekenhuis                                   | Dr Willem Dewilde                                             | 90                           | 14                                            |
|            | Charleroi, CHU de Charleroi – Hopital Civil Marie Curie        | Dr Adel Aminian                                               | 48                           | 3                                             |
|            | Aalst, OLV Ziekenhuis                                          | Prof. Emanuele Barbato----from 6th Sep 2018 Dr Jozef Bartunek | 47                           | 7                                             |
|            | Liege, CHR La Citadelle                                        | Dr Suzanne Pourbaix                                           | 24                           | 11                                            |
|            | Brussels, CHU St. Pierre UMC St. Pieter                        | Dr Panagiotis Xaplanteris                                     | 2                            | 2                                             |
| Bulgaria   |                                                                |                                                               | 183                          | 11                                            |
|            | Sofia, UMHAT St. Anna                                          | Dr Vasil Velchev                                              | 91                           |                                               |

| Country        | Site name                                               | Principal investigator    | Patients randomised (n=4579) | Patients consented but not randomised (n=625) |
|----------------|---------------------------------------------------------|---------------------------|------------------------------|-----------------------------------------------|
|                | Plovdiv, MHAT "Sveta Karidad" Plovdiv                   | Dr Dimitar Karageorgiev   | 60                           | 10                                            |
|                | Sofia, National Heart Hospital                          | Dr Hristo Mateev          | 23                           | 1                                             |
|                | Sofia, Tokuda Hospital                                  | Prof. Valeri Gelev        | 9                            |                                               |
| Czech Republic |                                                         |                           | 134                          | 17                                            |
|                | Brno, University Hospital Brno                          | Prof. Petr Kala           | 120                          | 17                                            |
|                | Praha, Na Homolce Hospital                              | Dr Martin Mates           | 14                           |                                               |
| Denmark        | Roskilde, Roskilde Hospital Kogevej                     | Dr Henning Kelbæk         | 13                           |                                               |
| Estonia        | Tallinn, North-Estonia Medical Centre Foundation        | Dr Peep Laanmets          | 259                          | 12                                            |
| France         |                                                         |                           | 578                          | 67                                            |
|                | Massy, Hopital Prive Jacques Cartier                    | Dr Thomas Hovasse         | 129                          | 19                                            |
|                | Montauban, Clinique du Pont de Chaume                   | Dr Laurent Delorme        | 124                          | 7                                             |
|                | Marseille, CHU La Timone                                | Prof. Thomas Cuisset      | 41                           |                                               |
|                | Anecy, Centre Hospitalier Anecy Genvois                 | Dr Loïc Belle             | 37                           |                                               |
|                | Caen, Centre hospitalier regional universitaire de Caen | Prof. Farzin Beygui       | 33                           | 9                                             |
|                | Nantes, Hopital Prive le Confluent                      | Dr Ashok Tirouvanziam     | 31                           |                                               |
|                | Montpellier, Clinique du Millenaire                     | Prof. Christophe Piot     | 30                           | 4                                             |
|                | Caen, Hopital Prive Saint Martin                        | Dr Jean François Morelle  | 27                           | 4                                             |
|                | Rouen, Clinique Saint-Hilaire                           | Dr Rene Koning            | 27                           | 7                                             |
|                | Metz, Hopital de Mercy                                  | Dr Mathieu Valla          | 24                           | 3                                             |
|                | Dijon, GCIDB – Hopital Prive Dijon Bourgogne            | Dr Philippe Brunel        | 23                           | 5                                             |
|                | Nimes, CHU Caremeau                                     | Dr Guillaume Cayla        | 18                           | 4                                             |
|                | Creteil, Centre Hospitalier Universitaire Henri-Mondor  | Prof. Emmanuel Teiger     | 12                           | 2                                             |
|                | Paris, Hopital Universitaire Pitie-Salpetriere          | Prof. Gilles Montalescot  | 10                           | 2                                             |
|                | Paris, Hopital Europeen Georges-Pompidou                | Prof. Christian Spaulding | 9                            | 1                                             |
|                | Saint-Denis, Centre Cardiologique du Nord               | Dr Phillipe Guyon         | 3                            |                                               |
| Germany        |                                                         |                           | 24                           | 6                                             |

| Country | Site name                                                 | Principal investigator                                     | Patients randomised (n=4579) | Patients consented but not randomised (n=625) |
|---------|-----------------------------------------------------------|------------------------------------------------------------|------------------------------|-----------------------------------------------|
|         | Homburg, Saarland University                              | Prof. Felix Mahfoud                                        | 20                           | 6                                             |
|         | Landshut, Landshut-Archdorf Krankenhaus                   | Dr Pyxaras, Stylianos                                      | 4                            |                                               |
| Hungary |                                                           |                                                            | 68                           | 5                                             |
|         | Budapest, Semmelweis University Heart and Vascular Center | Prof. Béla Merkely                                         | 46                           | 5                                             |
|         | Szeged, Invasive Cardiology Unit University of Szeged     | Dr Imre Ungi                                               | 22                           |                                               |
| India   |                                                           |                                                            | 147                          | 11                                            |
|         | Coimbatore, G Kuppuswamy Naidu Memorial Hospital          | Dr Rajpal K Abhaichand                                     | 94                           | 10                                            |
|         | Surat, Shri BD Mehta Mahavir Heart Institute              | Dr Atul Damodar Abhyankar                                  | 33                           |                                               |
|         | Chennai, Apollo Hospitals, Chennai                        | Dr Sengottuvelu. G                                         | 13                           | 1                                             |
|         | Chennai, Madras Medical Mission                           | Dr Ajit Mulasari. S                                        | 7                            |                                               |
| Israel  |                                                           |                                                            | 100                          | 33                                            |
|         | Safed, Ziv Medical Center, Cardiology Department          | Dr Halabi Majdi                                            | 37                           | 9                                             |
|         | Petach Tikva, Rabin MC                                    | Prof. Ran Kornowski                                        | 34                           | 11                                            |
|         | Haifa, Rambam Medical Center                              | Prof. Ariel Roguin---from 14th Oct 2018 Dr Yair Feld       | 16                           | 6                                             |
|         | Jerusalem, Hadassah Ein Karem Medical Center              | Prof. Chaim Lotan                                          | 13                           | 7                                             |
| Italy   |                                                           |                                                            | 276                          | 37                                            |
|         | Rome, Policlinico Casilino                                | Dr Michael Donahue                                         | 99                           | 6                                             |
|         | Vimercate, Ospedale di Vimercate                          | Dr Stefano Garducci                                        | 48                           | 3                                             |
|         | Rozzano, Humanitas Research Hospital                      | Dr Bernhard Reimers                                        | 30                           | 2                                             |
|         | Rome, Policlinico Umberto I                               | Dr Gennaro Sardella                                        | 20                           | 2                                             |
|         | Milan, San Raffaele Hospital                              | Dr Antonio Colombo---from 20th June 2019 Dr Alaide Chieffo | 12                           | 1                                             |
|         | Catania, Ferrarotto Hospital                              | Prof. Corrado Tamburino                                    | 9                            | 2                                             |
|         | Messina, AOU Policlinico Martino                          | Dr Giuseppe Andò                                           | 8                            | 4                                             |
|         | Milan, Policlinico San Donato                             | Dr Luca Testa                                              | 8                            | 4                                             |
|         | Milan, Sacco Hospital                                     | Dr Maurizio Di Biasi                                       | 8                            | 6                                             |
|         | Rome, Ospedale Sandro Pertini                             | Dr Alessandro Sciahbasi                                    | 8                            | 3                                             |
|         | Caserta, Azienda Ospedaliera di Caserta                   | Prof.Dr Paolo Calabro                                      | 6                            | 1                                             |

| Country            | Site name                                               | Principal investigator | Patients randomised (n=4579) | Patients consented but not randomised (n=625) |
|--------------------|---------------------------------------------------------|------------------------|------------------------------|-----------------------------------------------|
|                    | Sant Anna e San Sebastiano                              |                        |                              |                                               |
|                    | Andria, Ospedale Lorenzo Bonomo                         | Dr Gianluigi Minervini | 5                            |                                               |
|                    | Cagliari, Azienda Ospedaliera Brotzu                    | Dr Bruno Loi           | 5                            |                                               |
|                    | Milan, Centro Cardiologico Monzino IRCCS                | Dr Franco Fabbicchi    | 5                            |                                               |
|                    | Milan, ASST Grande Ospedale Metropolitano Niguarda      | Dr Jacopo Oreglia      | 4                            | 3                                             |
|                    | Treviglio, ASST Bergamo Ovest                           | Dr Paolo Sganzerla     | 1                            |                                               |
| Japan              |                                                         |                        | 188                          | 17                                            |
|                    | Toyoake, Fujita Health University Hospital              | Prof. Yukio Ozaki      | 60                           | 2                                             |
|                    | Kokura, Fukuoka Kokura Memorial Hospital                | Dr Kenji Ando          | 43                           | 2                                             |
|                    | Osaka, Osaka Police Hospital                            | Dr Yoshiharu Higuchi   | 22                           | 4                                             |
|                    | Tokyo, Sakakibara Heart Institute                       | Dr Mamoru Nanasato     | 13                           | 1                                             |
|                    | Kanagawa, St. Marianna University School of Medicine    | Dr Yuki Ishibashi      | 11                           | 1                                             |
|                    | Gifu, Gifu Heart Center                                 | Dr Hitoshi Matsuo      | 10                           |                                               |
|                    | Nagoya, Japanese Red Cross Nagoya Daini Hospital        | Dr Ruka Yoshida        | 8                            | 2                                             |
|                    | Ichinomiya, Ichinomiya municipal hospital               | Dr Kiyokazu Shimizu    | 6                            | 2                                             |
|                    | Nagoya, Japanese Red Cross Nagoya                       | Dr Haruo Kamiya        | 4                            | 2                                             |
|                    | 634 – Japan, Tokyo, St. Lukes International Hospital    | Dr Nobuyuki Komiyama   | 4                            | 1                                             |
|                    | Nagakuteshi, Aichi Medical University Hospital          | Dr Tetsuya Amano       | 3                            |                                               |
|                    | Nagoya, Nagoya University Hospital                      | Dr Toyoaki Murohara    | 2                            |                                               |
|                    | Sapporo, Sapporo Higashi Tokushukai Hospital            | Dr Seiji Yamazaki      | 2                            |                                               |
| Kingdom of Bahrain | Riffa, Bahrain Defence Force Hospital                   | Dr Husam Noor          | 7                            | 1                                             |
| Macedonia          | Skopje, University Clinic of Cardiology                 | Dr Sasko Kedev         | 120                          | 3                                             |
| Poland             |                                                         |                        | 177                          | 7                                             |
|                    | Krakow, Institute Of Cardiology Jagiellonian University | Dr Jakub Podolec       | 69                           | 4                                             |

| Country      | Site name                                              | Principal investigator                                      | Patients randomised (n=4579) | Patients consented but not randomised (n=625) |
|--------------|--------------------------------------------------------|-------------------------------------------------------------|------------------------------|-----------------------------------------------|
|              | Poznan, Szpital Kliniczny Przemienienia Panskiego      | Prof. Maciej Lesiak                                         | 50                           | 1                                             |
|              | Wroclaw, 4 Wojskowy Szpital Kliniczny                  | Dr Krzysztof Reczuch                                        | 33                           | 1                                             |
|              | Lubin, Miedziowe Centrum Zdrowia SA                    | Dr Adian Wlodarczak                                         | 18                           | 1                                             |
|              | Krakow, University Hospital Krakow Poland              | Prof. Dariusz Dudek                                         | 7                            |                                               |
| Portugal     | Lisbon, Hospital de Santa Maria                        | Dr Pedro Canas da Silva                                     | 1                            |                                               |
| Saudi Arabia | King Fahd Armed Forces Hospital                        | Dr Mirvat Alasnag                                           | 16                           | 1                                             |
| Serbia       |                                                        |                                                             | 138                          | 11                                            |
|              | Belgrade, Institute for Cardiovascular Disease Dedinje | Dr Ljupco Mangovski – from 17 April 2019<br>Dr Dragan Topic | 67                           | 4                                             |
|              | Belgrade, Clinical Center of Serbia                    | Prof. Goran Stankovic                                       | 61                           | 7                                             |
|              | Sremska Kamenica, Institute of Cardiovascular Diseases | Dr Dragan Debeljacki                                        | 10                           |                                               |
| Singapore    |                                                        |                                                             | 46                           | 10                                            |
|              | Singapore, Tan Tock Seng Hospital                      | Prof. Paul Ong Jau Lueng                                    | 38                           | 10                                            |
|              | Singapore, KhooTeck Puat Hospital                      | Dr Syed Saqib Imran                                         | 8                            |                                               |
| South Korea  | Seoul, Asan Medical Center                             | Dr Park Seung-Jung                                          | 15                           |                                               |
| Spain        |                                                        |                                                             | 196                          | 10                                            |
|              | Huelva, Juan Ramon Jimenez Hospital                    | Dr José Francisco Diaz Fernandez                            | 47                           | 1                                             |
|              | Vigo, Alvaro Cunqueiro                                 | Prof. Andrés Iniguez                                        | 40                           | 2                                             |
|              | Barcelona, Hospital Vall Hebron                        | Dr Bruno Garcia del Blanco                                  | 27                           |                                               |
|              | Alicante, Hospital General Universitario de Alicante   | Dr Vicente Mainar                                           | 19                           | 2                                             |
|              | Madrid, Hospital 12 de Octubre                         | Dr Ivan Gomez Blazquez                                      | 17                           |                                               |
|              | El Palmar, Universitario Virgen de la Arrixaca         | Dr Eduardo Pinar                                            | 15                           | 1                                             |
|              | Madrid, Hospital Clinico San Carlos                    | Prof. Javier Escaned Barbosa                                | 11                           | 2                                             |
|              | Barcelona, Bellvitge University Hospital               | Dr Joan Antoni Gomez Hospital                               | 10                           | 2                                             |
|              | Santander, Hospital Universitario Valdecilla           | Dr Fermin Sainz                                             | 9                            |                                               |
|              | Majadahonda, Hospital Universitario Puerta de Hierro   | Dr Javier Goicolea                                          | 1                            |                                               |
| Sweden       |                                                        |                                                             | 8                            |                                               |
|              | Orebro, Orebro University Hospital                     | Dr Ole Fröbert                                              | 6                            |                                               |

| Country        | Site name                                                 | Principal investigator                                           | Patients randomised (n=4579) | Patients consented but not randomised (n=625) |
|----------------|-----------------------------------------------------------|------------------------------------------------------------------|------------------------------|-----------------------------------------------|
|                | Gavle, Gavle Hospital                                     | Dr Robert Kastberg                                               | 2                            |                                               |
| Switzerland    |                                                           |                                                                  | 499                          | 111                                           |
|                | Bern, Inselspital                                         | Dr Aris Moschovitis---from 20th Oct 2020 Prof. Stephan Windecker | 308                          | 61                                            |
|                | Liestal, Kantonsspital Baselland                          | Dr Gregor Leibundgut                                             | 68                           | 14                                            |
|                | Lugano, Cardiocentro Ticino                               | Dr Giovanni Pedrazzini                                           | 31                           | 9                                             |
|                | Geneva, University Hospital                               | Prof. Marco Roffi                                                | 29                           | 13                                            |
|                | Bern, Lindenhofspital                                     | Dr Ali Garachemani                                               | 28                           | 3                                             |
|                | Zurich, University Hospital Zurich                        | Dr Patrick Siegrist                                              | 18                           | 7                                             |
|                | Fribourg, HFR Hopital cantonal                            | Prof. Stéphane Cook                                              | 17                           | 4                                             |
| Netherlands    |                                                           |                                                                  | 539                          | 122                                           |
|                | Rotterdam, Maasstad Ziekenhuis                            | Dr Peter Smits                                                   | 233                          | 79                                            |
|                | Terneuzen, Zorgsaam                                       | Dr Al Mafragi                                                    | 87                           | 5                                             |
|                | Emmen, Treant Zorggroep                                   | PI Dr Jessurun---from 1st July 2020 Dr Ruifrok                   | 67                           | 9                                             |
|                | Eindhoven, Catharina Ziekenhuis                           | Dr Pim Tonino                                                    | 54                           | 10                                            |
|                | Arnhem, Rijnstate Ziekenhuis                              | Dr Peter Danse                                                   | 29                           | 8                                             |
|                | Hertogenbosch, Jeroen Bosch Ziekenhuis                    | Dr J. Polad                                                      | 21                           | 3                                             |
|                | Dordrecht, Albert Schweitzer Ziekenhuis                   | Dr Floris Kauer                                                  | 20                           | 6                                             |
|                | Enschede, Medisch Spectrum Twente                         | Dr Clemens von Birgelen                                          | 19                           |                                               |
|                | Nieuwegein, Antonius Ziekenhuis Nieuwegein                | Dr Jurrien ten Berg                                              | 5                            | 1                                             |
|                | Breda, Amphia Ziekenhuis                                  | Dr Sander Ijsselmuiden                                           | 3                            |                                               |
|                | Den Haag, Hagahospital                                    | Dr Samer Somi                                                    | 1                            | 1                                             |
| United Kingdom |                                                           |                                                                  | 279                          | 48                                            |
|                | Bristol, Bristol Heart Institute                          | Dr Tom Johnson                                                   | 55                           | 13                                            |
|                | Worcester, Worcestershire Royal Hospital                  | Dr Helen Routledge                                               | 43                           | 8                                             |
|                | Brighton, Brighton & Sussex University Hospitals Trust    | Dr David Hildick-Smith                                           | 40                           | 3                                             |
|                | Bournemouth, Royal Bournemouth Hospital                   | Dr Jehangir Din                                                  | 34                           | 7                                             |
|                | Wolverhampton, Heart and Lung Centre – New Cross Hospital | Dr Shahzad Munir                                                 | 22                           | 6                                             |



| <b>Country</b> | <b>Site name</b>                                           | <b>Principal investigator</b> | <b>Patients randomised (n=4579)</b> | <b>Patients consented but not randomised (n=625)</b> |
|----------------|------------------------------------------------------------|-------------------------------|-------------------------------------|------------------------------------------------------|
|                | Blackburn, Royal Blackburn Hospital                        | Dr John McDonald              | 20                                  | 1                                                    |
|                | Stevenage, Lee Haynes Research Institute, Lister Hospital  | Dr Neville Kukreja            | 20                                  | 1                                                    |
|                | Stoke on Trent, Royal Stoke University Hospital            | Prof. Mamas Mamas             | 20                                  | 5                                                    |
|                | Newcastle upon Tyne, Freeman Hospital                      | Dr Rajiv Das                  | 13                                  | 1                                                    |
|                | Manchester, Wythenshawe Hospital                           | Dr Hussain Contractor         | 8                                   | 3                                                    |
|                | Derry, Altnagelvin Hospital                                | Dr Aaron Peace                | 2                                   |                                                      |
|                | London, St. George's Hospitals                             | Dr Rupert Williams            | 2                                   |                                                      |
| Vietnam        | Vietnam National Heart Institute – Bach Mai Hospital Hanoi | Prof. Nguyen Ngoc Quang       | 25                                  | 2                                                    |

## eMethods. Additional Information

### 1. Criteria for High Bleeding Risk

Post-percutaneous coronary intervention (PCI), patients are at high bleeding risk if at least one of the following criteria applies:

1. Clinical indication for treatment with oral anticoagulant (OAC) for at least 12 months.
2. Recent (<12 months) nonaccess site bleeding episode(s) that required medical attention (i.e. actionable bleeding).
3. Previous bleeding episode(s) that required hospitalization if the underlying cause had not been definitively treated (i.e. surgical removal of the bleeding source).
4. Age  $\geq 75$  years.
5. Systemic conditions associated with an increased bleeding risk (e.g. hematological disorders, including a history of current thrombocytopenia defined as a platelet count  $< 100.00 / \text{mm}^3$  ( $< 100 \times 10^9 / \text{L}$ ) or any known coagulation disorder associated with increased bleeding risk).
6. Documented anemia, defined as repeated hemoglobin levels  $< 11 \text{ g/dL}$  or transfusion during the 4 weeks before inclusion.
7. Need for chronic treatment with steroids or nonsteroidal anti-inflammatory drugs.
8. Diagnosed malignancy (other than skin) considered at high bleeding risk including gastrointestinal, genitourinary/renal and pulmonary.
9. Stroke at any time or transient ischemic attack in the previous 6 months.
10. PRECISE-DAPT score  $\geq 25$ .

### 2. Inclusion and Exclusion Criteria

---

#### Inclusion Criteria

---

##### *Inclusion criteria after index PCI*

1. Age  $\geq 18$  years
2. At least one high bleeding risk criterion (listed above)
3. All coronary lesions successfully treated with Ultimaster stent
4. Free of any flow-limiting angiographic complications that required prolonged dual antiplatelet therapy (DAPT) duration based on operator's decision
5. All stages of PCI were complete and no further PCI was planned

##### *Inclusion criteria at 1-month randomization visit (30–44 days after qualifying index PCI)*

1. At least one high bleeding risk criterion (listed above) or on the basis of post-PCI actionable nonaccess-site related bleeding episode
2. Uneventful 30-day clinical course (i.e. freedom from any new episode of acute coronary syndrome, symptomatic restenosis, stent thrombosis, stroke, any revascularization requiring prolonged DAPT)
3. If not on OAC:
  - a) Patient was on DAPT regimen of aspirin and a P2Y<sub>12</sub> inhibitor;
  - b) Patient with one type of P2Y<sub>12</sub> inhibitor for at least 7 days
4. If on OAC:
  - a) Patient was on the same type of OAC for at least 7 days;
  - b) Patient was on clopidogrel for at least 7 days

---

#### Exclusion Criteria

---

Patients were not eligible if any of the following applied:

1. Treated with stent other than Ultimaster stent within 6 months prior to index PCI
  2. Treated for in-stent restenosis or stent thrombosis at index PCI or within 6 months before
  3. Treated with a bioresorbable scaffold at any time prior to index procedure
  4. Incapable of providing written informed consent
  5. Under judicial protection, tutorship or curatorship
  6. Unable to understand and follow study-related instructions or unable to comply with study protocol
  7. Active bleeding requiring medical attention (Bleeding Academic Research Consortium [BARC]  $\geq 2$ ) on randomization visit
  8. Life expectancy less than 1 year
-

- 
9. Known hypersensitivity or allergy to aspirin, clopidogrel, ticagrelor, prasugrel, cobalt chromium or sirolimus
  10. Any planned and anticipated PCI
  11. Participation in another trial
  12. Pregnant or breastfeeding women
- 

### **3. Treatment Regimen**

Patients were treated according to the randomized regimen from the day of randomization until 11 months after randomization (12 months after the index procedure). After 11 months post randomization, antiplatelet therapy was at the discretion of treating physician.

#### **3.1. Abbreviated DAPT regimen**

*In patients not on OAC:* DAPT was discontinued, and a single antiplatelet agent (SAPT) was continued until at least 11 months post randomization (i.e. 12 months after index PCI).

*In patients on OAC:* DAPT was discontinued. Either aspirin or clopidogrel was continued until 5 months post randomization (i.e. 6 months after index PCI). OAC was continued until at least 11 months post randomization (i.e. 12 months after index PCI).

#### **3.2. Standard DAPT regimen**

*In patients not on OAC:* Aspirin was continued until at least 11 months post randomization (i.e. 12 months after index PCI). The P2Y12 inhibitor being taken at the time of randomization was continued for at least 5 months and up to 11 months post randomization (i.e. 12 months after index PCI).

*In patients on OAC:* Aspirin and clopidogrel were continued for at least 2 months (i.e. 3 months after index PCI) and up to 11 months post randomization (i.e. 12 months after index PCI). Thereafter, either aspirin or clopidogrel was continued up to 11 months post randomization (i.e. 12 months after index PCI). OAC was continued until at least 11 months post randomization (i.e. 12 months after index PCI).

The rationale for mandating clopidogrel as the only acceptable P2Y12 inhibitor in the OAC population in both study arms came from the absence of safety and efficacy data regarding the combination of ticagrelor or prasugrel with aspirin and OAC (as patients requiring OAC were excluded from approval RCT) and a recommendation of Class III (i.e. not indicated) in the European guidelines.

#### **3.3. Implementation of randomized study regimens**

Study regimens were implemented by regular drug prescription as described above. The investigators provided the necessary prescription to the study participants. The following are recommended according to the current guidelines and local practice.

- Aspirin is prescribed at the standard dose of at least 75 mg/day and up to 162 mg/day.
- Clopidogrel is prescribed in standard dose of 75 mg once daily.
- Prasugrel is prescribed at the standard dose of 10 mg/day or 5 mg/day in patients weighing less than 60 kg or who are over 75 years old. In regions where other standard dose exists (i.e. Japan), prasugrel dosage is adjusted according to the locally approved dose.
- Ticagrelor is prescribed at the standard dose of 180 mg/day (90 mg b.i.d.).
- Vitamin K antagonist is dosed to keep the international normalized ratio within the guideline range.
- Nonvitamin K oral antagonist oral anticoagulants (NOAC; rivaroxaban, edoxaban, dabigatran and apixaban) are given in locally approved doses.
- Switching from a vitamin K antagonist to NOAC or vice-versa is not allowed unless there are clinical and well documented reasons for doing so. Similarly, switching from a NOAC to a VKA during the course of the study is not allowed, unless dictated by a clinical and documented reason (e.g. change in renal function during the course of the investigation), which will be captured in the eCRF.

Prescribed units of aspirin, clopidogrel, prasugrel, ticagrelor and OAC were recorded in the eCRF. Patients are queried on general drug adherence.

## **4. Outcome Definitions**

### **4.1. Death**

All deaths were categorized as cardiovascular, noncardiovascular, or undetermined based on the definitions below.

#### **4.1.1. Cardiovascular death**

Cardiovascular death was defined as death resulting from an acute myocardial infarction, sudden cardiac death, death due to heart failure, death due to stroke, death due to cardiovascular procedures, death due to cardiovascular hemorrhage, and death due to other cardiovascular causes.

#### **4.1.2. Death due to acute myocardial infarction**

Death due to acute myocardial infarction was death by any mechanism (arrhythmia, heart failure, low output) within 30 days after a myocardial infarction related to the immediate consequences of the myocardial infarction, such as progressive congestive heart failure (CHF), inadequate cardiac output, or refractory arrhythmia. If these events occurred after a “break” (e.g. a CHF- and arrhythmia-free period of at least a week), they were designated by the immediate cause, even though the myocardial infarction may have increased the risk of that event (e.g. late arrhythmic death becomes more likely after an acute myocardial infarction). The acute myocardial infarction was verified to the extent possible by the diagnostic criteria outlined for acute myocardial infarction or by autopsy findings showing recent myocardial infarction or recent coronary thrombus. Sudden cardiac death, if accompanied by symptoms suggestive of myocardial ischemia, new ST elevation, new left bundle branch block (LBBB), or evidence of fresh thrombus by coronary angiography and/or at autopsy should be considered death resulting from an acute myocardial infarction, even if death occurs before blood samples or 12-lead electrocardiogram (ECG) could be obtained, or at a time before the appearance of cardiac biomarkers in the blood. Death resulting from a procedure to treat a myocardial infarction (i.e. PCI, coronary artery bypass graft surgery [CABG]), or to treat a complication resulting from myocardial infarction, should also be considered death due to acute myocardial infarction. Death resulting from an elective coronary procedure to treat myocardial ischemia (i.e. chronic stable angina) or death due to a myocardial infarction that occurred as a direct consequence of a cardiovascular investigation/procedure/operation should be considered as a death due to a cardiovascular procedure.

#### **4.1.3. Sudden cardiac death**

Sudden cardiac death was death that occurred unexpectedly, not following an acute myocardial infarction, and included the following:

- Death witnessed and occurring without new or worsening symptoms.
- Death witnessed within 60 min of the onset of new or worsening cardiac symptoms, unless documented (i.e. by ECG or other objective) to be due to acute myocardial infarction.
- Death witnessed and attributed to an identified arrhythmia (e.g. captured on an ECG recording, witnessed on a monitor, or unwitnessed but found on implantable cardioverter-defibrillator review).
- Death after unsuccessful resuscitation from cardiac arrest. Death after successful resuscitation from cardiac arrest and without identification of a noncardiac etiology.
- Unwitnessed death without other cause of death (information regarding the patient’s clinical status preceding death should be provided, if available).

##### **4.1.3.1. GENERAL CONSIDERATIONS**

A subject seen alive and clinically stable 24 h prior to being found dead without any evidence or information of a specific cause of death was classified as “sudden cardiac death.” Typical scenarios included:

- Subject well the previous day but found dead in bed the next day
- Subject found dead at home on the couch with the television on
- Deaths for which there was no information beyond “Patient found dead at home” may be classified as “death due to other cardiovascular causes”.

#### **4.1.4. Death due to heart failure or cardiogenic shock**

Death due to congestive heart failure referred to a death in association with clinically worsening symptoms and/or signs of heart failure not following an acute myocardial infarction. Deaths due to heart failure could have

various etiologies, including single or recurrent myocardial infarctions, ischemic or nonischemic cardiomyopathy, hypertension, or valvular disease. Cardiogenic shock not occurring in the context of an acute myocardial infarction or as the consequence of an arrhythmia occurring in the absence of worsening heart failure was defined as systolic blood pressure (SBP) <90 mm Hg for greater than 1 hour, not responsive to fluid resuscitation and/or heart rate correction, and felt to be secondary to cardiac dysfunction and associated with at least one of the following signs of hypoperfusion:

- Cool, clammy skin or
- Oliguria (urine output <30 mL/h) or
- Altered sensorium or
- Cardiac index <2.2 L/min/m<sup>2</sup>
- Cardiogenic shock could also be defined if SBP <90 mm Hg and increased to ≥90 mm Hg in less than 1 hour with positive inotropic or vasopressor agents alone and/or with mechanical support.

#### 4.1.5. Death due to stroke

Death due to stroke referred to death after a stroke that was either a direct consequence of the stroke or a complication of the stroke. Acute stroke was verified to the extent possible by the diagnostic criteria outlined for stroke.

#### 4.1.6. Death due to cardiovascular procedures

Death due to cardiovascular procedures referred to death caused by the immediate complications of a cardiac procedure and excluded death resulting from procedures to treat an acute myocardial infarction or the complications resulting from an acute myocardial infarction.

#### 4.1.7. Death due to cardiovascular hemorrhage

Death due to cardiovascular hemorrhage referred to death related to hemorrhage such as a nonstroke intracranial hemorrhage, nonprocedural or nontraumatic vascular rupture (e.g. aortic aneurysm), or hemorrhage causing cardiac tamponade.

#### 4.1.8. Death due to other cardiovascular causes

Death due to other cardiovascular causes referred to a cardiovascular death not included in the above categories (e.g. pulmonary embolism or peripheral artery disease).

#### 4.1.9. Noncardiovascular death

Noncardiovascular death was defined as any death that was not thought to be due to a cardiovascular cause. The following categories may be collected.

##### 4.1.9.1. *NONMALIGNANT CAUSES*

- Pulmonary
- Renal
- Gastrointestinal
- Hepatobiliary
- Pancreatic
- Infection (includes sepsis)
- Noninfectious (e.g. systemic inflammatory response syndrome)
- Hemorrhage\*, excluding hemorrhagic strokes and bleeding in the setting of coronary revascularization
- Noncardiovascular procedure or surgery
- Accidental (e.g. physical accidents or drug overdose) or trauma
- Suicide
- Prescription drug error (e.g. prescribed drug overdose, use of inappropriate drug, or drug-drug interaction)
- Neurological process that was not a stroke or hemorrhage
- Other noncardiovascular, specify: \_\_\_\_\_

*\*Examples: Death due to gastrointestinal bleeding was not considered a cardiovascular death. Death due to retroperitoneal hematoma following PCI was considered cardiovascular death. Death due to intracerebral hemorrhage was considered cardiovascular death.*

#### 4.1.9.2. MALIGNANT CAUSES

Death from a malignant cause was that resulting directly from the cancer, or death resulting from a complication of the cancer (e.g. infection, complication of surgery / chemotherapy / radiotherapy), or death resulting from withdrawal of other therapies because of concerns relating to the poor prognosis associated with the cancer.

Cancer deaths that arose from cancers that were present prior to randomization or which developed subsequently were further classified (worsening prior malignancy; new malignancy).

#### 4.1.10. Undetermined cause of death

Undetermined cause of death referred to a death not attributable to one of the above categories of cardiovascular death or to a noncardiovascular cause, due to absence of any information (e.g. the only available information is “patient died”). The use of this category of death was discouraged and should have only applied to a minimal number of cases when no information at all on the circumstances of death were available (i.e. found on obituary of local newspaper). In all circumstances the reviewer used all available information to attribute to one of the categories based on best clinical judgment.

For each death event an assessment was made as to whether the event was caused (on the basis of the totality of the evidence) by a bleeding (i.e. a fatal bleeding occurred) or not.

## 4.2. Myocardial Infarction

For the primary analysis, the myocardial infarction outcome was defined based on the Third Universal Definition of myocardial infarction with the exception of periprocedural myocardial infarction after PCI, which was defined according to the Society for Cardiovascular Angiography and Intervention (SCAI) definition. For secondary analyses, PCI-related myocardial infarction according to the Third Universal Definition (type 4a) was also adjudicated.

### 4.2.1. Spontaneous myocardial infarction (>48 h after intervention, myocardial infarction type 1)

Symptoms suggestive of ischemia/infarction in association with ECG, cardiac biomarker, or pathologic evidence of infarction were as follows:

- Detection of a rise and/or fall of cardiac biomarker values (preferably cardiac troponin T or I) with at least one value above the 99th percentile upper reference limit (URL) and with at least one of the following:
  - Symptoms of ischemia
  - New or presumed new significant ST segment-T wave (ST-T) changes or new LBBB
  - Development of new Q waves in the ECG
  - Evidence of new loss of viable myocardium or new regional wall motion abnormality
  - Identification of an intracoronary thrombus by angiography or autopsy

Spontaneous myocardial infarction typically occurs after the periprocedural period and may be secondary to late stent complications or progression of native disease (e.g. nonculprit lesion plaque rupture). Performance of ECG and angiography supports adjudication to either a target or nontarget vessel or lesion in most cases.

### 4.2.2. Type 2 myocardial infarction

In instances of myocardial injury with necrosis where a condition other than coronary artery disease (CAD) contributes to an imbalance between myocardial oxygen supply and/or demand, e.g. coronary endothelial dysfunction, coronary artery spasm, coronary embolism, tachy/bradyarrhythmias, anemia, respiratory failure, hypotension, and hypertension with or without left ventricular hypertrophy.

### 4.2.3. Type 3 myocardial infarction

Cardiac death with symptoms suggestive of myocardial ischemia and presumed new ischemic ECG changes or new LBBB, but death occurred before cardiac biomarkers were obtained, or before cardiac biomarker values would be increased.

### 4.2.4. Type 4a myocardial infarction (not used for primary analysis, see section 4.8 for primary definition of periprocedural myocardial infarction)

Type 4a myocardial infarction was defined by elevation of cardiac troponin (cTn) values ( $>5 \times$  URL) occurring within 48 h of the procedure in patients with normal baseline values ( $\leq$ URL) or a rise of cTn values  $>20\%$  if the baseline values are elevated and are stable or falling. In addition, at least one of the following was required:

- Symptoms suggestive of myocardial ischemia
- New ischemic ECG changes
- Angiographic findings consistent with a procedural complication
- Imaging demonstration of new loss of viable myocardium or new regional wall motion abnormality.

### 4.2.5. Type 4b myocardial infarction

Type 4b myocardial infarction was defined as stent thrombosis associated with myocardial infarction when detected by coronary angiography or autopsy in the setting of evidence of myocardial ischemia and with a rise and/or fall of cardiac biomarker values with at least one value above the URL.

### 4.2.6. Type 4c myocardial infarction

Type 4c myocardial infarction was defined as spontaneous myocardial infarction where a restenosis was the only angiographic explanation.

### 4.2.7. Type 5 myocardial infarction

#### 4.2.7.1. CORONARY ARTERY BYPASS GRAFTING-RELATED MYOCARDIAL INFARCTION

Coronary artery bypass grafting (CABG) related myocardial infarction was defined by elevation of troponin values ( $>10 \times$  URL) occurring within 48 h of the procedure in patients with normal baseline cTn values ( $\leq$ URL). In addition, at least one of the following was required:

- New pathological Q waves or new LBBB
- Angiographic documented new graft or new native coronary artery occlusion
- Imaging evidence of new loss of viable myocardium or new regional wall motion abnormality.

#### 4.2.8. Periprocedural myocardial infarction after PCI (within 48 h of PCI)

Periprocedural myocardial infarction was defined based on the SCAI definitions as follows:

- 1) In patients with normal baseline creatine kinase-MB (CK-MB): The peak CK-MB measured within 48 h of the procedure rises to  $\geq 10 \times$  the local laboratory ULN, or to  $\geq 5 \times$  ULN with new pathologic Q-waves in  $\geq 2$  contiguous leads or new persistent LBBB, OR in the absence of CK-MB measurements and a normal baseline cTn, a cTn (I or T) level measured within 48 h of the PCI rises to  $\geq 70 \times$  the local laboratory ULN, or  $\geq 35 \times$  ULN with new pathologic Q-waves in  $\geq 2$  contiguous leads or new persistent LBBB.
- 2) In patients with elevated baseline CK-MB (or cTn) in whom the biomarker levels are stable or falling: The CK-MB (or cTn) rises by an absolute increment equal to those levels recommended above from the most recent preprocedure level.
- 3) In patients with elevated CK-MB (or cTn) in whom the biomarker levels have not been shown to be stable or falling: The CK-MB (or cTn) rises by an absolute increment equal to those levels recommended above plus new ST-segment elevation or depression plus signs consistent with a clinically relevant myocardial infarction, such as new onset or worsening heart failure or sustained hypotension.

#### 4.2.9. Target-vessel vs. nontarget-vessel myocardial infarction

Any myocardial infarction not clearly attributable to a nontarget vessel was considered as target-vessel myocardial infarction.

### 4.3. Stent Thrombosis

Stent thrombosis was defined by the Academic Research Consortium as follows:

#### 4.3.1. Definite stent thrombosis

Definite stent thrombosis was considered to have occurred by either angiographic or pathological confirmation:

a. *Angiographic confirmation of stent thrombosis (the incidental angiographic documentation of stent occlusion in the absence of clinical signs or symptoms was not considered a confirmed stent thrombosis ([silent occlusion])*

The presence of an intracoronary thrombus that originates in the stent or in the segment 5 mm proximal or distal to the stent and presence of at least 1 of the following criteria within a 48-h time window:

- Acute onset of ischemic symptoms at rest
- New ischemic ECG changes that suggest acute ischemia
- Typical rise and fall in cardiac biomarkers (refer to definition of spontaneous myocardial infarction: Troponin or CK-MB  $>99$ th percentile of URL)
- Nonocclusive thrombus. Intracoronary thrombus was defined as a (spheric, ovoid, or irregular) noncalcified filling defect or lucency surrounded by contrast material (on 3 sides or within a coronary stenosis) seen in multiple projections, or persistence of contrast material within the lumen, or a visible embolisation of intraluminal material downstream
- Occlusive thrombus Thrombolysis In Myocardial Infarction (TIMI) 0 or TIMI 1 intrastent or proximal to a stent up to the most adjacent proximal side branch or main branch (if originates from the side branch)

b. *Pathological confirmation of stent thrombosis*

- Evidence of recent thrombus within the stent determined at autopsy or via examination of tissue retrieved following thrombectomy

#### 4.3.2. Probable stent thrombosis

Clinical definition of probable stent thrombosis was considered to have occurred after intracoronary stenting in the following cases:



- Any unexplained death within the first 30 days.
- Irrespective of the time after the index procedure, any myocardial infarction related to documented acute ischemia in the territory of the implanted stent without angiographic confirmation of stent thrombosis and in the absence of any other obvious cause.

#### 4.3.3. Possible stent thrombosis

Clinical definition of possible stent thrombosis was considered to have occurred with any unexplained death from 30 days following intracoronary stenting until end of trial follow-up.

### 4.4. Stroke

Stroke was defined as an acute episode of focal or global neurological dysfunction caused by central nervous system (CNS) vascular injury as a result of hemorrhage or infarction. CNS included brain, spinal cord and retina. Stroke was defined as follows.

#### 4.4.1. Ischemic stroke

Ischemic stroke was defined as an acute episode of focal cerebral, spinal, or retinal dysfunction caused by CNS infarction. Evidence of infarction was defined as “Pathological, imaging, or other objective evidence of acute cerebral, spinal cord, or retinal focal ischemic injury in a defined vascular distribution; or in the absence of the above (i.e. imaging or autopsy unavailable), clinical evidence of cerebral, spinal cord, or retinal focal ischemic injury was based on symptoms persisting for  $\geq 24$  h or until death, and other etiologies excluded. Hemorrhagic infarction, defined as a parenchymal hemorrhage after CNS infarction, was considered an ischemic stroke

#### 4.4.2. Cerebral hemorrhage

Hemorrhages in the CNS were classified as stroke if they were nontraumatic, caused by a vascular event, and resulted in injury to the CNS. In contrast, traumatic hemorrhages were not characterized as stroke. Subdural hematoma was not classified as a stroke. The diagnoses included in this section were intracerebral hemorrhage (intraparenchymal and intraventricular) and subarachnoid hemorrhage (both aneurysmal and nonaneurysmal).

#### 4.4.3. Stroke caused by intracerebral hemorrhage

Rapidly developing clinical signs of neurological dysfunction (focal or global) attributable to a focal collection of blood within the brain parenchyma or ventricular system that was not caused by trauma.

#### 4.4.4. Stroke caused by subarachnoid hemorrhage

Rapidly developing signs of neurological dysfunction (focal or global) and/or headache because of bleeding into the subarachnoid space (the space between the arachnoid membrane and the pia mater of the brain or spinal cord), which was not caused by trauma. Hemorrhages could be further classified according to location (example, supratentorial, subtentorial, etc.)

#### 4.4.5. Stroke not otherwise specified

An episode of acute neurological dysfunction presumed to be caused by ischemia or hemorrhage, persisting  $\geq 24$  h or until death, but without sufficient evidence to be classified as one of the above.

### 4.5. Bleeding

All potential bleeding events were primarily adjudicated according to Bleeding Academic Research Consortium (BARC) classification.

|        |                                                                                                                                                                                                                                                                                                                                                    |
|--------|----------------------------------------------------------------------------------------------------------------------------------------------------------------------------------------------------------------------------------------------------------------------------------------------------------------------------------------------------|
| Type 0 | No bleeding                                                                                                                                                                                                                                                                                                                                        |
| Type 1 | Bleeding that is not actionable and does not cause the patient to seek unscheduled performance of studies, hospitalization, or treatment by a health care professional. May include episodes leading to self-discontinuation of medical therapy by the patient, without consulting a health care professional.                                     |
| Type 2 | Any overt, actionable sign of hemorrhage (e.g. more bleeding than would be expected for a clinical circumstance; including bleeding found by imaging alone) that does not fit the criteria for Types 3, 4, or 5 but does meet at least one of the following criteria:<br>Requiring nonsurgical, medical intervention by a health care professional |

- Leading to hospitalization of increased level of care  
 Prompting evaluation
- Type 3a Overt bleeding plus hemoglobin drop of 3 to <5\* g/dL (provided hemoglobin drop is related to bleed)  
 Any transfusion with overt bleeding
- Type 3b Overt bleeding plus hemoglobin drop  $\geq 5^*$  g/dL (provided hemoglobin drop is related to bleed)  
 Cardiac tamponade  
 Bleeding requiring surgical intervention for control (excluding dental / nasal / skin / hemorrhoid)  
 Bleeding requiring intravenous vasoactive agents
- Type 3c Intracranial hemorrhage (does not include microbleeds or hemorrhagic transformation; does include intraspinal)  
 Subcategories: confirmed by autopsy or imaging or lumbar puncture  
 Intra-ocular bleed compromising vision
- Type 4 CABG-related bleeding  
 Perioperative intracranial bleeding within 48 h  
 Reoperation following closure of sternotomy for the purpose of controlling bleeding  
 Transfusion of  $\geq 5$  units of whole blood or packed red blood cells within 48 hour period†  
 Chest tube output  $\geq 2$  L within a 24 hour period
- Type 5a Probable fatal bleeding; no autopsy or imaging confirmation, but clinically suspicious
- Type 5b Definite fatal bleeding: overt bleeding or autopsy or imaging confirmation
- Platelet transfusions were recorded and reported, and were not included in these definitions until further information was obtained about the relationship to outcomes.
- \*Corrected for transfusion (1 unit packed red blood cells or 1 unit whole blood=1g/dL hemoglobin).
- †Cell saver products were not counted.

**eTable 1.** Details on DAPT and SAPT at 1-, 3-, 6- and 12-mo study visit

|                                               | Male patients          |                        |         | Female patients      |                      |         | All Male patients      | All Female patients   | p-value |
|-----------------------------------------------|------------------------|------------------------|---------|----------------------|----------------------|---------|------------------------|-----------------------|---------|
|                                               | Abbreviated DAPT       | Standard DAPT          | p-value | Abbreviated DAPT     | Standard DAPT        | p-value |                        |                       |         |
| <b>At 1-month visit (after randomisation)</b> |                        |                        |         |                      |                      |         |                        |                       |         |
| DAPT                                          | n = 1590, 41 (2.6%)    | n = 1581, 1573 (99.5%) | <0.001  | n = 705, 11 (1.6%)   | n = 703, 699 (99.4%) | <0.001  | n = 3171, 1614 (50.9%) | n = 1408, 710 (50.4%) | 0.773   |
| Clopidogrel                                   | n = 1590, 28 (1.8%)    | n = 1581, 1253 (79.3%) | <0.001  | n = 705, 11 (1.6%)   | n = 703, 545 (77.5%) | <0.001  | n = 3171, 1281 (40.4%) | n = 1408, 556 (39.5%) | 0.579   |
| Prasugrel                                     | n = 1590, 1 (0.1%)     | n = 1581, 33 (2.1%)    | <0.001  | n = 705, 0 (0.0%)    | n = 703, 22 (3.1%)   | <0.001  | n = 3171, 34 (1.1%)    | n = 1408, 22 (1.6%)   | 0.189   |
| Ticagrelor                                    | n = 1590, 12 (0.8%)    | n = 1581, 287 (18.2%)  | <0.001  | n = 705, 0 (0.0%)    | n = 703, 132 (18.8%) | <0.001  | n = 3171, 299 (9.4%)   | n = 1408, 132 (9.4%)  | 1.000   |
| SAPT                                          | n = 1590, 1542 (97.0%) | n = 1581, 6 (0.4%)     | <0.001  | n = 705, 692 (98.2%) | n = 703, 3 (0.4%)    | <0.001  | n = 3171, 1548 (48.8%) | n = 1408, 695 (49.4%) | 0.749   |
| Acetylsalicylic acid                          | n = 1590, 453 (28.5%)  | n = 1581, 0 (0.0%)     | <0.001  | n = 705, 207 (29.4%) | n = 703, 1 (0.1%)    | <0.001  | n = 3171, 453 (14.3%)  | n = 1408, 208 (14.8%) | 0.682   |
| Clopidogrel                                   | n = 1590, 871 (54.8%)  | n = 1581, 6 (0.4%)     | <0.001  | n = 705, 365 (51.8%) | n = 703, 2 (0.3%)    | <0.001  | n = 3171, 877 (27.7%)  | n = 1408, 367 (26.1%) | 0.280   |
| Prasugrel                                     | n = 1590, 19 (1.2%)    | n = 1581, 0 (0.0%)     | <0.001  | n = 705, 8 (1.1%)    | n = 703, 0 (0.0%)    | 0.008   | n = 3171, 19 (0.6%)    | n = 1408, 8 (0.6%)    | 1.000   |
| Ticagrelor                                    | n = 1590, 199 (12.5%)  | n = 1581, 0 (0.0%)     | <0.001  | n = 705, 112 (15.9%) | n = 703, 0 (0.0%)    | <0.001  | n = 3171, 199 (6.3%)   | n = 1408, 112 (8.0%)  | 0.042   |
| <b>At 3-month visit</b>                       |                        |                        |         |                      |                      |         |                        |                       |         |
| DAPT                                          | n = 1563, 57 (3.6%)    | n = 1560, 1335 (85.6%) | <0.001  | n = 699, 14 (2.0%)   | n = 694, 602 (86.7%) | <0.001  | n = 3123, 1392 (44.6%) | n = 1393, 616 (44.2%) | 0.846   |
| Clopidogrel                                   | n = 1563, 43 (2.8%)    | n = 1560, 1034 (66.3%) | <0.001  | n = 699, 13 (1.9%)   | n = 694, 453 (65.3%) | <0.001  | n = 3123, 1077 (34.5%) | n = 1393, 466 (33.5%) | 0.519   |
| Prasugrel                                     | n = 1563, 1 (0.1%)     | n = 1560, 34 (2.2%)    | <0.001  | n = 699, 0 (0.0%)    | n = 694, 22 (3.2%)   | <0.001  | n = 3123, 35 (1.1%)    | n = 1393, 22 (1.6%)   | 0.198   |
| Ticagrelor                                    | n = 1563, 13 (0.8%)    | n = 1560, 267 (17.1%)  | <0.001  | n = 699, 1 (0.1%)    | n = 694, 127 (18.3%) | <0.001  | n = 3123, 280 (9.0%)   | n = 1393, 128 (9.2%)  | 0.822   |

|                          |                           |                          |        |                         |                         |        |                           |                          |       |
|--------------------------|---------------------------|--------------------------|--------|-------------------------|-------------------------|--------|---------------------------|--------------------------|-------|
| SAPT                     | n = 1563,<br>1498 (95.8%) | n = 1560,<br>221 (14.2%) | <0.001 | n = 699, 682<br>(97.6%) | n = 694, 89<br>(12.8%)  | <0.001 | n = 3123,<br>1719 (55.0%) | n = 1393, 771<br>(55.3%) | 0.871 |
| Acetylsalicylic acid     | n = 1563,<br>445 (28.5%)  | n = 1560, 65<br>(4.2%)   | <0.001 | n = 699, 200<br>(28.6%) | n = 694, 23<br>(3.3%)   | <0.001 | n = 3123, 510<br>(16.3%)  | n = 1393, 223<br>(16.0%) | 0.827 |
| Clopidogrel              | n = 1563,<br>850 (54.4%)  | n = 1560,<br>155 (9.9%)  | <0.001 | n = 699, 368<br>(52.6%) | n = 694, 65<br>(9.4%)   | <0.001 | n = 3123,<br>1005 (32.2%) | n = 1393, 433<br>(31.1%) | 0.468 |
| Prasugrel                | n = 1563, 18<br>(1.2%)    | n = 1560, 0<br>(0.0%)    | <0.001 | n = 699, 7<br>(1.0%)    | n = 694, 0<br>(0.0%)    | 0.015  | n = 3123, 18<br>(0.6%)    | n = 1393, 7<br>(0.5%)    | 0.832 |
| Ticagrelor               | n = 1563,<br>186 (11.9%)  | n = 1560, 1<br>(0.1%)    | <0.001 | n = 699, 107<br>(15.3%) | n = 694, 1<br>(0.1%)    | <0.001 | n = 3123, 187<br>(6.0%)   | n = 1393, 108<br>(7.8%)  | 0.031 |
| <b>At 6-month visit</b>  |                           |                          |        |                         |                         |        |                           |                          |       |
| DAPT                     | n = 1541, 50<br>(3.2%)    | n = 1536,<br>917 (59.7%) | <0.001 | n = 689, 20<br>(2.9%)   | n = 684,<br>455 (66.5%) | <0.001 | n = 3077, 967<br>(31.4%)  | n = 1373, 475<br>(34.6%) | 0.038 |
| Clopidogrel              | n = 1541, 39<br>(2.5%)    | n = 1536,<br>640 (41.7%) | <0.001 | n = 689, 19<br>(2.8%)   | n = 684,<br>327 (47.8%) | <0.001 | n = 3077, 679<br>(22.1%)  | n = 1373, 346<br>(25.2%) | 0.023 |
| Prasugrel                | n = 1541, 0<br>(0.0%)     | n = 1536, 34<br>(2.2%)   | <0.001 | n = 689, 0<br>(0.0%)    | n = 684, 19<br>(2.8%)   | <0.001 | n = 3077, 34<br>(1.1%)    | n = 1373, 19<br>(1.4%)   | 0.455 |
| Ticagrelor               | n = 1541, 11<br>(0.7%)    | n = 1536,<br>243 (15.8%) | <0.001 | n = 689, 1<br>(0.1%)    | n = 684,<br>109 (15.9%) | <0.001 | n = 3077, 254<br>(8.3%)   | n = 1373, 110<br>(8.0%)  | 0.813 |
| SAPT                     | n = 1541,<br>1349 (87.5%) | n = 1536,<br>603 (39.3%) | <0.001 | n = 689, 624<br>(90.6%) | n = 684,<br>223 (32.6%) | <0.001 | n = 3077,<br>1952 (63.4%) | n = 1373, 847<br>(61.7%) | 0.268 |
| Acetylsalicylic acid     | n = 1541,<br>417 (27.1%)  | n = 1536,<br>234 (15.2%) | <0.001 | n = 689, 191<br>(27.7%) | n = 684, 87<br>(12.7%)  | <0.001 | n = 3077, 651<br>(21.2%)  | n = 1373, 278<br>(20.2%) | 0.498 |
| Clopidogrel              | n = 1541,<br>737 (47.8%)  | n = 1536,<br>365 (23.8%) | <0.001 | n = 689, 322<br>(46.7%) | n = 684,<br>134 (19.6%) | <0.001 | n = 3077,<br>1102 (35.8%) | n = 1373, 456<br>(33.2%) | 0.096 |
| Prasugrel                | n = 1541, 19<br>(1.2%)    | n = 1536, 0<br>(0.0%)    | <0.001 | n = 689, 8<br>(1.2%)    | n = 684, 0<br>(0.0%)    | 0.008  | n = 3077, 19<br>(0.6%)    | n = 1373, 8<br>(0.6%)    | 1.000 |
| Ticagrelor               | n = 1541,<br>177 (11.5%)  | n = 1536, 4<br>(0.3%)    | <0.001 | n = 689, 103<br>(14.9%) | n = 684, 2<br>(0.3%)    | <0.001 | n = 3077, 181<br>(5.9%)   | n = 1373, 105<br>(7.6%)  | 0.029 |
| <b>At 12-month visit</b> |                           |                          |        |                         |                         |        |                           |                          |       |
| DAPT                     | n = 1515, 77<br>(5.1%)    | n = 1497,<br>523 (34.9%) | <0.001 | n = 670, 24<br>(3.6%)   | n = 670,<br>247 (36.9%) | <0.001 | n = 3012, 600<br>(19.9%)  | n = 1340, 271<br>(20.2%) | 0.837 |
| Clopidogrel              | n = 1515, 58<br>(3.8%)    | n = 1497,<br>365 (24.4%) | <0.001 | n = 670, 21<br>(3.1%)   | n = 670,<br>173 (25.8%) | <0.001 | n = 3012, 423<br>(14.0%)  | n = 1340, 194<br>(14.5%) | 0.707 |
| Prasugrel                | n = 1515, 1<br>(0.1%)     | n = 1497, 12<br>(0.8%)   | 0.002  | n = 670, 0<br>(0.0%)    | n = 670, 10<br>(1.5%)   | 0.002  | n = 3012, 13<br>(0.4%)    | n = 1340, 10<br>(0.7%)   | 0.256 |

|                      |                        |                       |        |                         |                       |        |                          |                          |       |
|----------------------|------------------------|-----------------------|--------|-------------------------|-----------------------|--------|--------------------------|--------------------------|-------|
| Ticagrelor           | n = 1515, 18<br>(1.2%) | n = 1497, 146 (9.8%)  | <0.001 | n = 670, 3<br>(0.4%)    | n = 670, 64<br>(9.6%) | <0.001 | n = 3012, 164<br>(5.4%)  | n = 1340, 67<br>(5.0%)   | 0.608 |
| SAPT                 | n = 1515, 908 (59.9%)  | n = 1497, 817 (54.6%) | 0.003  | n = 670, 464<br>(69.3%) | n = 670, 368 (54.9%)  | <0.001 | n = 3012, 1725 (57.3%)   | n = 1340, 832<br>(62.1%) | 0.003 |
| Acetylsalicylic acid | n = 1515, 413 (27.3%)  | n = 1497, 525 (35.1%) | <0.001 | n = 670, 198<br>(29.6%) | n = 670, 251 (37.5%)  | 0.003  | n = 3012, 938<br>(31.1%) | n = 1340, 449<br>(33.5%) | 0.130 |
| Clopidogrel          | n = 1515, 356 (23.5%)  | n = 1497, 288 (19.2%) | 0.004  | n = 670, 187<br>(27.9%) | n = 670, 116 (17.3%)  | <0.001 | n = 3012, 644<br>(21.4%) | n = 1340, 303<br>(22.6%) | 0.381 |
| Prasugrel            | n = 1515, 20<br>(1.3%) | n = 1497, 0<br>(0.0%) | <0.001 | n = 670, 6<br>(0.9%)    | n = 670, 0<br>(0.0%)  | 0.031  | n = 3012, 20<br>(0.7%)   | n = 1340, 6<br>(0.4%)    | 0.524 |
| Ticagrelor           | n = 1515, 119 (7.9%)   | n = 1497, 4<br>(0.3%) | <0.001 | n = 670, 73<br>(10.9%)  | n = 670, 1<br>(0.1%)  | <0.001 | n = 3012, 123<br>(4.1%)  | n = 1340, 74<br>(5.5%)   | 0.040 |

*Abbreviations: DAPT, dual antiplatelet therapy; SAPT, single antiplatelet therapy.*

Data are n (%) or n/N (%).

Patients switched to routine care around 12 months visit post-qualifying PCI; switching was allowed inside a 14-day window.

**eTable 2.** Baseline Characteristics According to Sex

|                                                       | <b>Male patients</b><br>(n = 3171) | <b>Female patients</b><br>(n = 1408) | <b>p-value</b> |
|-------------------------------------------------------|------------------------------------|--------------------------------------|----------------|
| Age, years                                            | 75.20 ± 9.04                       | 77.92 ± 7.70                         | <0.001         |
| BMI, kg/m <sup>2</sup>                                | 27.40 ± 4.48                       | 27.24 ± 5.19                         | 0.296          |
| Family history of CAD                                 | 709 (22.4%)                        | 400 (28.4%)                          | <0.001         |
| Arterial hypertension                                 | 2397 (75.6%)                       | 1156 (82.1%)                         | <0.001         |
| Diabetes mellitus                                     | 1062 (33.5%)                       | 476 (33.8%)                          | 0.839          |
| Hyperlipidemia                                        | 2137 (67.4%)                       | 960 (68.2%)                          | 0.608          |
| Current smoking                                       | 331 (10.5%)                        | 83 (5.9%)                            | <0.001         |
| Peripheral/Vascular disease                           | 364 (11.5%)                        | 121 (8.6%)                           | 0.004          |
| History of HF                                         | 652 (20.6%)                        | 215 (15.3%)                          | <0.001         |
| LVEF, %                                               | 52.36 ± 11.79                      | 55.14 ± 10.96                        | <0.001         |
| Prior MI                                              | 660 (20.8%)                        | 204 (14.5%)                          | <0.001         |
| Prior PCI                                             | 891 (28.1%)                        | 297 (21.1%)                          | <0.001         |
| Prior Stroke                                          | 294 (9.3%)                         | 116 (8.2%)                           | 0.287          |
| Prior CABG                                            | 285 (9.0%)                         | 56 (4.0%)                            | <0.001         |
| Prior bleeding before/after qualifying PCI            | 256 (8.1%)                         | 103 (7.3%)                           | 0.404          |
| Known Chronic pulmonary disease                       | 392 (12.4%)                        | 146 (10.4%)                          | 0.059          |
| Known Liver disease                                   | 41 (1.3%)                          | 20 (1.4%)                            | 0.780          |
| Atrial fibrillation                                   | 1098 (34.6%)                       | 392 (27.8%)                          | <0.001         |
| Known Active cancer                                   | 187 (5.9%)                         | 49 (3.5%)                            | <0.001         |
| Known Haematological or Coagulation Disorders         | 339 (10.7%)                        | 239 (17.0%)                          | <0.001         |
| Chronic treatment with steroids or NSAIDs             | 285 (9.0%)                         | 156 (11.1%)                          | 0.030          |
| Prior VKA                                             | 491 (15.5%)                        | 135 (9.6%)                           | <0.001         |
| Clinical indication for 12 months OAC                 | 1248 (39.4%)                       | 418 (29.7%)                          | <0.001         |
| PRECISE DAPT score¶                                   | 25.78 ± 11.10                      | 28.96 ± 10.40                        | <0.001         |
| Prior bleeding                                        | 238 (7.5%)                         | 82 (5.8%)                            | 0.044          |
| Hemoglobin, g/L                                       | 13.52 ± 1.78                       | 12.54 ± 1.60                         | <0.001         |
| WBC count¶, 10 <sup>9</sup> /L                        | 8.03 ± 3.58                        | 8.49 ± 14.25                         | 0.086          |
| Creatinine clearance MDRD, ml/min/1.73 m <sup>2</sup> | 72.43 ± 24.31                      | 67.34 ± 23.04                        | <0.001         |
| <b>Clinical presentation*</b>                         |                                    |                                      |                |
| Stable angina                                         | 1287 (40.6%)                       | 562 (39.9%)                          | 0.672          |
| Silent ischemia                                       | 407 (12.8%)                        | 112 (8.0%)                           | <0.001         |

|                            |             |             |       |
|----------------------------|-------------|-------------|-------|
| NSTEMI                     | 781 (24.6%) | 372 (26.4%) | 0.197 |
| STEMI                      | 346 (10.9%) | 192 (13.6%) | 0.010 |
| Unstable angina            | 350 (11.0%) | 170 (12.1%) | 0.313 |
| Killip class II, III or IV | 351 (11.1%) | 155 (11.0%) | 1.000 |
| Cardiac arrest             | 41 (1.3%)   | 17 (1.2%)   | 0.887 |

*Abbreviations: BMI, body mass index; CABG, coronary artery bypass grafting; CAD, coronary artery disease; DAPT, dual antiplatelet therapy; HF, heart failure; LVEF, left ventricular ejection fraction; MI, myocardial infarction; NSAIDs: non-steroidal anti-inflammatory drugs; NSTEMI, non-ST-segment elevation myocardial infarction; OAC, oral anticoagulation; PCI, percutaneous coronary intervention; STEMI, ST-segment elevation myocardial infarction; VKA, vitamin K-antagonist; WBC, White blood cell.*

Data are mean (SD), n (%), or n/n (%) in case of missing data.

\*Data from first PCI only.

¶calculated at screening visit. n=1 PRECISE Score calculated without risk due to WBC.

**eTable 3.** Procedural Characteristics According to Sex

|                                          | <b>Male patients</b><br>(n = 3171) | <b>Female patients</b><br>(n = 1408) | <b>p-value</b> |
|------------------------------------------|------------------------------------|--------------------------------------|----------------|
| Arterial access site                     |                                    |                                      |                |
| femoral                                  | 434 (13.7%)                        | 219 (15.6%)                          | 0.099          |
| radial                                   | 2730 (86.1%)                       | 1184 (84.1%)                         | 0.077          |
| brachial                                 | 7 (0.2%)                           | 5 (0.4%)                             | 0.531          |
| IABP                                     | 40 (1.3%)                          | 14 (1.0%)                            | 0.553          |
| LVAD                                     | 6 (0.2%)                           | 2 (0.1%)                             | 1.000          |
| Total amount of contrast, cc             | 170.61 ± 81.17                     | 160.50 ± 76.60                       | <0.001         |
| Medications during the procedure*        |                                    |                                      |                |
| Unfractionated heparin                   | 3012 (95.0%)                       | 1344 (95.5%)                         | 0.552          |
| Bivalirudin                              | 6 (0.2%)                           | 1 (0.1%)                             | 0.684          |
| Low molecular weight heparin             | 94 (3.0%)                          | 33 (2.3%)                            | 0.283          |
| Cangrelor                                | 9 (0.3%)                           | 2 (0.1%)                             | 0.520          |
| Glycoprotein II/IIIa inhibitors          | 111 (3.5%)                         | 51 (3.6%)                            | 0.862          |
| Total no. of PCIs¶                       |                                    |                                      |                |
| one                                      | 2893 (91.2%)                       | 1266 (89.9%)                         | 0.165          |
| two                                      | 266 (8.4%)                         | 139 (9.9%)                           | 0.114          |
| three                                    | 12 (0.4%)                          | 3 (0.2%)                             | 0.576          |
| Total no of vessels treated per patient¥ |                                    |                                      |                |
| one                                      | 2344 (73.9%)                       | 1021 (72.5%)                         | 0.327          |
| two                                      | 698 (22.0%)                        | 326 (23.2%)                          | 0.398          |
| three                                    | 129 (4.1%)                         | 61 (4.3%)                            | 0.688          |
| Treated vessel(s) per patient            |                                    |                                      |                |
| Left main                                | 178 (5.6%)                         | 82 (5.8%)                            | 0.782          |
| Left arterial descending artery          | 1724 (54.4%)                       | 787 (55.9%)                          | 0.351          |
| Left circumflex artery                   | 963 (30.4%)                        | 378 (26.8%)                          | 0.017          |
| Right coronary artery                    | 1111 (35.0%)                       | 549 (39.0%)                          | 0.010          |
| Bypass graft                             | 61 (1.9%)                          | 15 (1.1%)                            | 0.044          |
| Total no of treated lesions per patient  |                                    |                                      |                |
| one                                      | 2154 (67.9%)                       | 961 (68.3%)                          | 0.837          |
| two                                      | 698 (22.0%)                        | 327 (23.2%)                          | 0.377          |
| three or more                            | 319 (10.1%)                        | 120 (8.5%)                           | 0.115          |
| Total stented lesions per patient        |                                    |                                      |                |
| one                                      | 2196 (69.3%)                       | 980 (69.6%)                          | 0.835          |
| two                                      | 678 (21.4%)                        | 315 (22.4%)                          | 0.460          |



|                                                |                        |                        |       |
|------------------------------------------------|------------------------|------------------------|-------|
| three or more                                  | 297 (9.4%)             | 113 (8.0%)             | 0.145 |
| At least one complex lesion B2 or C            | 2188 (69.0%)           | 953 (67.7%)            | 0.388 |
| Number of stents per patient (mean ± SD)       | 1.76 ± 1.12            | 1.73 ± 1.12            | 0.380 |
| Total stent length per patient (mean ± SD)     | 40.15 ± 29.03          | 38.07 ± 28.31          | 0.024 |
| Overlapping stenting                           | 657 (20.7%)            | 281 (20.0%)            | 0.579 |
| Bifurcation or trifurcation stenting§          | 131 (4.1%)             | 53 (3.8%)              | 0.625 |
| OCT of treated lesion                          | 97 (3.1%)              | 37 (2.6%)              | 0.449 |
| IVUS of treated lesion                         | 203 (6.4%)             | 84 (6.0%)              | 0.598 |
| <b>Treated lesions</b>                         | N = 4611               | N = 2023               |       |
| Lesion location                                |                        |                        |       |
| Left main                                      | 179 (3.9%)             | 84 (4.2%)              | 0.604 |
| Left arterial descending artery                | 1969 (42.7%)           | 857 (42.4%)            | 0.790 |
| Left circumflex artery                         | 1071 (23.2%)           | 424 (21.0%)            | 0.036 |
| Right coronary artery                          | 1327 (28.8%)           | 640 (31.6%)            | 0.022 |
| Bypass graft                                   |                        |                        |       |
| SVG                                            | 57 (1.2%)              | 15 (0.7%)              | 0.144 |
| LIMA/RIMA/Radial graft                         | 11 (0.2%)              | 4 (0.2%)               | 0.748 |
| Bifurcation or trifurcation disease per lesion | 756 (16.4%)            | 300 (14.8%)            | 0.121 |
| Rotablator used per lesion                     | 112 (2.4%)             | 39 (1.9%)              | 0.248 |
| Final residual lesion stenosis <20%            | 4549 (98.7%)           | 2001 (98.9%)           | 0.423 |
| TIMI flow before PCI per lesion                | n = 4570               | n = 2004               |       |
| 0 or 1                                         | 621 (13.6%)            | 271 (13.5%)            |       |
| 2                                              | 491 (10.7%)            | 212 (10.6%)            |       |
| 3                                              | 3458 (75.7%)           | 1521 (75.9%)           |       |
| TIMI flow after PCI per lesion                 | n = 4609               | n = 2022               |       |
| 0 or 1                                         | 13 (0.3%)              | 1 (0.0%)               |       |
| 2                                              | 31 (0.7%)              | 17 (0.8%)              |       |
| 3                                              | 4565 (99.0%)           | 2004 (99.1%)           |       |
| <b>Lesion treatment</b>                        |                        |                        |       |
| Ballooning or thrombus aspiration only         | 81 (1.8%)              | 33 (1.6%)              |       |
| Stenting                                       | 4530 (98.2%)           | 1990 (98.4%)           |       |
| <b>Stented lesions</b>                         | <b>N = 4530</b>        | <b>N = 1990</b>        |       |
| Number of stents used per lesion               | 1.24 ± 0.55            | 1.23 ± 0.52            | 0.457 |
| Overlapping stenting per lesion                | 705/4500 (15.7%)       | 302/1980 (15.3%)       | 0.679 |
| Total stent length per lesion, mm              | 28.10 ± 16.65          | 26.94 ± 15.73          | 0.011 |
| Average stent diameter per lesion, mm          | 3.02 ± 0.48            | 2.94 ± 0.46            | 0.001 |
| Direct stenting per lesion                     | n = 4530, 1387 (30.6%) | n = 1990, 632 (31.8%)  | 0.413 |
| Post-dilatation per lesion                     | n = 4530, 2847 (62.8%) | n = 1990, 1182 (59.4%) | 0.021 |

*Abbreviations: APT, antiplatelet therapy; DAPT, dual antiplatelet therapy; IABP, intra-aortic balloon pump; IVUS, intravascular ultrasound; LIMA, left internal mammary artery; LVAD, left ventricular assist device; RIMA, right internal mammary artery; SVG, saphenous vein graft; TIMI: Thrombolysis in Myocardial Infarction, OCT, optical coherence tomography; PCI, percutaneous coronary intervention.*

Data are mean (SD), n (%), or n/n (%) in case of missing data.

\* Data from first PCI only.

¶ One PCI and up to two staged PCIs. The last PCI was the qualifying PCI 1 month before the randomization.

§ into both main- and side-branch.

¥ Left main counted as two vessels.

**eTable 4.** Procedural Characteristics by Randomized Antiplatelet Regimen and Sex

|                                            | Male patients             |                        |         | Female patients          |                       |         |
|--------------------------------------------|---------------------------|------------------------|---------|--------------------------|-----------------------|---------|
|                                            | Abbreviated DAPT (n=1590) | Standard DAPT (n=1581) | p-value | Abbreviated DAPT (n=705) | Standard DAPT (n=703) | p-value |
| Arterial access site                       |                           |                        |         |                          |                       |         |
| femoral                                    | 239 (15.0%)               | 195 (12.3%)            | 0.030   | 121 (17.2%)              | 98 (13.9%)            | 0.106   |
| radial                                     | 1348 (84.8%)              | 1382 (87.4%)           | 0.035   | 582 (82.6%)              | 602 (85.6%)           | 0.126   |
| brachial                                   | 3 (0.2%)                  | 4 (0.3%)               | 0.726   | 2 (0.3%)                 | 3 (0.4%)              | 0.687   |
| IABP                                       | 16 (1.0%)                 | 24 (1.5%)              | 0.207   | 8 (1.1%)                 | 6 (0.9%)              | 0.789   |
| LVAD                                       | 2 (0.1%)                  | 4 (0.3%)               | 0.451   | 0 (0.0%)                 | 2 (0.3%)              | 0.249   |
| Total amount of contrast, cc               | 172.26 ± 82.09            | 168.94 ± 80.22         | 0.251   | 158.94 ± 75.79           | 162.06 ± 77.41        | 0.446   |
| Medications during the procedure*          |                           |                        |         |                          |                       |         |
| Unfractionated heparin                     | 1510 (95.0%)              | 1502 (95.1%)           | 0.935   | 674 (95.6%)              | 670 (95.3%)           | 0.800   |
| Bivalirudin                                | 4 (0.3%)                  | 2 (0.1%)               | 0.687   | 1 (0.1%)                 | 0 (0.0%)              | 1.000   |
| Low molecular weight heparin               | 48 (3.0%)                 | 46 (2.9%)              | 0.917   | 15 (2.1%)                | 18 (2.6%)             | 0.603   |
| Cangrelor                                  | 6 (0.4%)                  | 3 (0.2%)               | 0.507   | 2 (0.3%)                 | 0 (0.0%)              | 0.500   |
| Glycoprotein II/IIIa inhibitors            | 60 (3.8%)                 | 51 (3.2%)              | 0.44    | 26 (3.7%)                | 25 (3.6%)             | 1.000   |
| Total no. of PCIs ¶                        |                           |                        |         |                          |                       |         |
| one                                        | 1456 (91.6%)              | 1437 (90.9%)           | 0.530   | 637 (90.4%)              | 629 (89.5%)           | 0.596   |
| two                                        | 126 (7.9%)                | 140 (8.9%)             | 0.370   | 65 (9.2%)                | 74 (10.5%)            | 0.423   |
| three                                      | 8 (0.5%)                  | 4 (0.3%)               | 0.387   | 3 (0.4%)                 | 0 (0.0%)              | 0.249   |
| Total no. of vessels treated per patient ¥ |                           |                        |         |                          |                       |         |
| one                                        | 1197 (75.3%)              | 1147 (72.5%)           | 0.082   | 519 (73.6%)              | 502 (71.4%)           | 0.371   |
| two                                        | 328 (20.6%)               | 370 (23.4%)            | 0.065   | 155 (22.0%)              | 171 (24.3%)           | 0.312   |
| three                                      | 65 (4.1%)                 | 64 (4.0%)              | 1       | 31 (4.4%)                | 30 (4.3%)             | 1.000   |

|                                         |               |               |       |               |               |       |
|-----------------------------------------|---------------|---------------|-------|---------------|---------------|-------|
| Treated vessel(s) per patient           |               |               |       |               |               |       |
| Left main                               | 83 (5.2%)     | 95 (6.0%)     | 0.355 | 43 (6.1%)     | 39 (5.5%)     | 0.733 |
| Left arterial descending artery         | 850 (53.5%)   | 874 (55.3%)   | 0.318 | 390 (55.3%)   | 397 (56.5%)   | 0.668 |
| Left circumflex artery                  | 478 (30.1%)   | 485 (30.7%)   | 0.728 | 174 (24.7%)   | 204 (29.0%)   | 0.071 |
| Right coronary artery                   | 563 (35.4%)   | 548 (34.7%)   | 0.682 | 291 (41.3%)   | 258 (36.7%)   | 0.081 |
| Bypass graft                            | 32 (2.0%)     | 29 (1.8%)     | 0.796 | 6 (0.9%)      | 9 (1.3%)      | 0.452 |
| Total nr of treated lesions per patient |               |               |       |               |               |       |
| one                                     | 1094 (68.8%)  | 1060 (67.0%)  | 0.304 | 485 (68.8%)   | 476 (67.7%)   | 0.689 |
| two                                     | 341 (21.4%)   | 357 (22.6%)   | 0.466 | 162 (23.0%)   | 165 (23.5%)   | 0.850 |
| three or more                           | 155 (9.7%)    | 164 (10.4%)   | 0.595 | 58 (8.2%)     | 62 (8.8%)     | 0.704 |
| Total stented lesions per patient       |               |               |       |               |               |       |
| one                                     | 1119 (70.4%)  | 1077 (68.1%)  | 0.178 | 492 (69.8%)   | 488 (69.4%)   | 0.908 |
| two                                     | 329 (20.7%)   | 349 (22.1%)   | 0.363 | 157 (22.3%)   | 158 (22.5%)   | 0.949 |
| three or more                           | 142 (8.9%)    | 155 (9.8%)    | 0.428 | 56 (7.9%)     | 57 (8.1%)     | 0.922 |
| At least one complex lesion B2 or C     | 1083 (68.1%)  | 1105 (69.9%)  | 0.283 | 479 (67.9%)   | 474 (67.4%)   | 0.864 |
| Number of stents per patient            | 1.74 ± 1.10   | 1.78 ± 1.13   | 0.401 | 1.73 ± 1.18   | 1.72 ± 1.06   | 0.857 |
| Total stent length per patient          | 39.65 ± 28.64 | 40.65 ± 29.42 | 0.332 | 38.49 ± 30.56 | 37.66 ± 25.87 | 0.584 |
| Any overlapping stenting                | 342 (21.5%)   | 315 (19.9%)   | 0.274 | 146 (20.7%)   | 135 (19.2%)   | 0.505 |
| Bifurcation or trifurcation stenting §  | 61 (3.8%)     | 70 (4.4%)     | 0.423 | 22 (3.1%)     | 31 (4.4%)     | 0.211 |
| OCT of treated lesion                   | 44 (2.8%)     | 53 (3.4%)     | 0.355 | 18 (2.6%)     | 19 (2.7%)     | 0.869 |
| IVUS of treated lesion                  | 99 (6.2%)     | 104 (6.6%)    | 0.717 | 36 (5.1%)     | 48 (6.8%)     | 0.178 |

Abbreviations: DAPT, antiplatelet therapy; IABP, intra-aortic balloon pump; IVUS, intravascular ultrasound; LVAD, left ventricular assist device; OCT, optical coherence tomography; PCI, percutaneous coronary intervention.

Data are mean (SD), n (%), or n/n (%) in case of missing data.

\* Data from first PCI only.

¶ One PCI and up to two staged PCIs. The last PCI was the qualifying PCI 1 month before the randomization.

§ into both main- and side-branch.

¥ Left main counted as two vessels.

**eTable 5.** Treated Lesion Characteristics According to Sex and Randomly Allocated APT Regimen

Abbreviations: APT, antiplatelet therapy; DAPT, dual antiplatelet therapy; LIMA, left internal mammary artery; RIMA, right internal mammary artery; SVG, saphenous vein graft; TIMI: Thrombolysis in Myocardial Infarction.

|                                                | Male patients             |                        |         | Female patients          |                       |         |
|------------------------------------------------|---------------------------|------------------------|---------|--------------------------|-----------------------|---------|
|                                                | Abbreviated DAPT (n=1590) | Standard DAPT (n=1581) | p-value | Abbreviated DAPT (n=705) | Standard DAPT (n=703) | p-value |
| <b>Treated lesions</b>                         | N = 2286                  | N = 2325               |         | N=1008                   | N = 1015              |         |
| Lesion location                                |                           |                        |         |                          |                       |         |
| Left main                                      | 84 (3.7%)                 | 95 (4.1%)              | 0.464   | 44 (4.4%)                | 40 (3.9%)             | 0.635   |
| Left arterial descending artery                | 965 (42.2%)               | 1004 (43.2%)           | 0.505   | 429 (42.6%)              | 428 (42.2%)           | 0.852   |
| Left circumflex artery                         | 530 (23.2%)               | 541 (23.3%)            | 0.944   | 197 (19.5%)              | 227 (22.4%)           | 0.109   |
| Right coronary artery                          | 674 (29.5%)               | 653 (28.1%)            | 0.321   | 331 (32.8%)              | 309 (30.4%)           | 0.251   |
| Bypass graft                                   |                           |                        |         |                          |                       |         |
| SVG                                            | 28 (1.2%)                 | 29 (1.2%)              | 0.951   | 6 (0.6%)                 | 9 (0.9%)              | 0.559   |
| LIMA/RIMA/Radial graft                         | 7 (0.3%)                  | 4 (0.2%)               | 0.357   | 2 (0.2%)                 | 2 (0.2%)              | 0.994   |
| Bifurcation or trifurcation disease per lesion | 382 (16.7%)               | 374 (16.1%)            | 0.574   | 153 (15.2%)              | 147 (14.5%)           | 0.673   |
| Rotablator used per lesion                     | 57 (2.5%)                 | 55 (2.4%)              | 0.793   | 21 (2.1%)                | 18 (1.8%)             | 0.643   |
| Final residual lesion stenosis <20%            | 2251 (98.5%)              | 2298 (98.8%)           | 0.301   | 999 (99.1%)              | 1002 (98.7%)          | 0.428   |
| TIMI flow before PCI per lesion                | n = 2265                  | n = 2305               |         | n = 996                  | n = 1008              |         |
| 0 or 1                                         | 285 (12.6%)               | 336 (14.6%)            |         | 139 (14.0%)              | 132 (13.1%)           |         |
| 2                                              | 262 (11.6%)               | 229 (9.9%)             | 0.071   | 99 (9.9%)                | 113 (11.2%)           | 0.627   |
| 3                                              | 1718 (75.8%)              | 1740 (75.5%)           |         | 758 (76.1%)              | 763 (75.7%)           |         |
| TIMI flow after PCI per lesion                 | n = 2285                  | n = 2324               |         | n = 1008                 | n = 1014              |         |
| 0 or 1                                         | 10 (0.4%)                 | 3 (0.1%)               | 0.955   | 1 (0.1%)                 | 0 (0.0%)              |         |
| 2                                              | 12 (0.5%)                 | 19 (0.8%)              |         | 6 (0.6%)                 | 11 (1.1%)             | 0.000   |
| 3                                              | 2263 (99.0%)              | 2302 (99.1%)           |         | 1001 (99.3%)             | 1003 (98.9%)          |         |

| <b>Stented lesions</b>                | N = 2241         | N = 2289         |       | N = 997         | N = 993         |       |
|---------------------------------------|------------------|------------------|-------|-----------------|-----------------|-------|
| Number of stents used per lesion      | 1.25 ± 0.55      | 1.23 ± 0.55      | 0.474 | 1.24 ± 0.53     | 1.22 ± 0.51     | 0.572 |
| Overlapping stenting per lesion       | 365/2224 (16.4%) | 340/2276 (14.9%) | 0.186 | 160/989 (16.2%) | 142/991 (14.3%) | 0.263 |
| Total stent length per lesion         | 28.13 ± 16.80    | 28.08 ± 16.51    | 0.916 | 27.21 ± 16.40   | 26.66 ± 15.02   | 0.464 |
| Average stent diameter per lesion, mm | 3.02 ± 0.48      | 3.01 ± 0.49      | 0.651 | 2.95 ± 0.45     | 2.93 ± 0.47     | 0.209 |
| Direct stenting per lesion            | 656 (29.3%)      | 731 (31.9%)      | 0.085 | 320 (32.1%)     | 312 (31.4%)     | 0.772 |
| Post-dilatation per lesion            | 1438 (64.2%)     | 1409 (61.6%)     | 0.111 | 593 (59.5%)     | 589 (59.3%)     | 0.949 |

Data are mean (SD), n (%), or n/n (%) in case of missing data.

**eTable 6.** Unadjusted and Adjusted Clinical Outcomes at 11 mo Post Randomization (12-mo Follow-Up) in Male and Female Patients

|                                      |                         |                           |                        |         | Model 1          |              | Model 2          |              |
|--------------------------------------|-------------------------|---------------------------|------------------------|---------|------------------|--------------|------------------|--------------|
|                                      | Male patients (N =3171) | Female patients (N =1408) | Unadjusted HR (95% CI) | p-value | Adj. HR (95% CI) | Adj. p-value | Adj.HR (95% CI)  | Adj. p-value |
| NACE                                 | 243 (7.70)              | 111 (7.91)                | 1.02 (0.82-1.28)       | 0.831   | 1.00 (0.79-1.27) | 0.992        | 0.98 (0.78-1.25) | 0.891        |
| MACCE                                | 193 (6.12)              | 83 (5.92)                 | 0.96 (0.75-1.25)       | 0.780   | 0.93 (0.71-1.22) | 0.590        | 0.92 (0.70-1.20) | 0.540        |
| MCB                                  | 250 (7.99)              | 109 (7.85)                | 0.98 (0.78-1.23)       | 0.859   | 0.93 (0.73-1.18) | 0.550        | 0.90 (0.71-1.14) | 0.369        |
| Death                                | 107 (3.39)              | 49 (3.49)                 | 1.03 (0.74-1.45)       | 0.856   | 1.02 (0.71-1.47) | 0.922        | 1.02 (0.71-1.45) | 0.931        |
| Cardiovascular death                 | 54 (1.73)               | 27 (1.94)                 | 1.13 (0.71-1.79)       | 0.613   | 1.17 (0.71-1.95) | 0.535        | 1.22 (0.75-1.99) | 0.430        |
| Non-cardiovascular death             | 41 (1.32)               | 16 (1.15)                 | 0.88 (0.49-1.57)       | 0.662   | 0.82 (0.44-1.52) | 0.524        | 0.81 (0.44-1.50) | 0.508        |
| Undetermined death                   | 12 (0.39)               | 6 (0.43)                  | 1.13 (0.42-3.00)       | 0.812   | 0.87 (0.28-2.71) | 0.810        | 0.95 (0.33-2.69) | 0.920        |
| Cardiovascular or Undetermined death | 66 (2.10)               | 33 (2.37)                 | 1.13 (0.74-1.71)       | 0.576   | 1.15 (0.73-1.81) | 0.557        | 1.17 (0.75-1.82) | 0.495        |
| Cerebrovascular Accident             | 30 (0.97)               | 19 (1.37)                 | 1.43 (0.81-2.54)       | 0.222   | 1.30 (0.70-2.42) | 0.401        | 1.33 (0.72-2.43) | 0.361        |
| Stroke                               | 22 (0.71)               | 13 (0.94)                 | 1.33 (0.67-2.65)       | 0.412   | 1.18 (0.56-2.50) | 0.658        | 1.23 (0.59-2.53) | 0.583        |
| TIA                                  | 8 (0.26)                | 6 (0.43)                  | 1.69 (0.59-4.87)       | 0.331   | 1.56 (0.47-5.22) | 0.469        | 1.64 (0.52-5.18) | 0.399        |
| Myocardial infarction                | 81 (2.60)               | 28 (2.03)                 | 0.77 (0.50-1.19)       | 0.243   | 0.75 (0.47-1.17) | 0.204        | 0.74 (0.47-1.17) | 0.196        |
| Definite or Probable ST              | 16 (0.51)               | 7 (0.51)                  | 0.99 (0.41-2.39)       | 0.974   | 1.15 (0.44-2.99) | 0.771        | 1.10 (0.43-2.81) | 0.834        |
| Definite ST                          | 13 (0.42)               | 5 (0.37)                  | 0.87 (0.31-2.43)       | 0.784   | 0.94 (0.30-2.94) | 0.913        | 0.91 (0.30-2.71) | 0.860        |
| BARC Type 1 bleeding                 | 121 (3.87)              | 53 (3.81)                 | 0.99 (0.71-1.36)       | 0.937   | 0.98 (0.70-1.37) | 0.894        | 0.95 (0.68-1.34) | 0.772        |
| BARC Type 2 bleeding                 | 178 (5.70)              | 76 (5.49)                 | 0.96 (0.73-1.25)       | 0.751   | 0.91 (0.69-1.21) | 0.529        | 0.88 (0.67-1.17) | 0.390        |
| BARC Type 3 bleeding                 | 73 (2.34)               | 39 (2.82)                 | 1.21 (0.82-1.78)       | 0.346   | 1.13 (0.75-1.71) | 0.568        | 1.09 (0.73-1.65) | 0.663        |
| BARC Type 5 bleeding                 | 10 (0.32)               | 0 (0.00)                  | 9.33 (0.55-159.11)     | 0.037   |                  |              |                  |              |
| BARC Type 3 or 5 bleeding            | 83 (2.66)               | 39 (2.82)                 | 1.06 (0.72-1.55)       | 0.763   | 0.99 (0.66-1.48) | 0.959        | 0.96 (0.64-1.43) | 0.844        |

Nr of first events of each type (Kaplan-Meier failure %). Adjusted Hazard ratio (95% CI) from Cox's time-to-first event analyses in ITT population.

Model 1 (extended model also used for censor-weights): gender, age, BMI, family history of CAD, hypertension, diabetes mellitus, hyperlipidemia current smoking, known peripheral/vascular disease, history of heart failure, LVEF, prior MI, prior PCI, prior CVA, prior arterial or venous thromboembolism, prior CABG, prior prosthetic mechanical heart valve, prior bleeding, COPD, renal failure, liver disease, atrial fibrillation, active cancer, known hematological or coagulation disorder, chronic treatment with steroids or NSAIDS, prior OAC, clinical indication for 12-month OAC, PRECISE DAPT score, prior MI, PCI indication, Killip class II/III/IV, cardiac arrest, heart rate, systolic blood pressure, access site, IABP, LVAD, LM-LAD lesion, bi- or trifurcation, final residual stenosis <20%, TIMI flow pre-PCI, TIMI flow post-PCI, total stent length, prasugrel, ticagrelor.

Model 2 (simplified model, only including risk factors where male and females also differ): gender, age, family history of CAD, hypertension, hyperlipidemia, current smoking, known peripheral/vascular disease, history of heart failure, LVEF, prior MI, prior PCI, prior venous thromboembolism, prior CABG, COPD, renal failure, atrial fibrillation, active cancer, known hematological or coagulation disorder, chronic treatment with steroids or NSAIDS, prior OAC, clinical indication for 12-month OAC, PRECISE DAPT score, prior MI, PCI indication, heart rate, systolic blood pressure, access site, bi- or trifurcation, TIMI flow after PCI, total stent length, ticagrelor.

*Abbreviations: Adj., adjusted; BARC, Bleeding Academic Research Consortium; BMI, body mass index, CABG, coronary artery bypass grafting; CAD, coronary artery disease, CI, confidence interval; COPD, chronic obstructive pulmonary disease; CVA, cerebrovascular accident; HR, hazard ratio; IABP, intra-aortic balloon pump; LAD, left anterior descending artery; LM, left main; LVAD, left ventricular assist device; LVEF, left ventricular ejection fraction; MACCE, major adverse cardiac and cerebral events; MCB, major or clinically relevant non-major bleeding; MI, myocardial infarction; NACE, net adverse clinical events; NSAIDS, non-steroidal anti-inflammatory drugs; OAC, oral anticoagulation; PCI, percutaneous coronary intervention; ST, stent thrombosis; TIA, transient ischemic attack; TIMI, Thrombolysis in Myocardial Infarction.*



**eTable 7.** Clinical Outcomes at 11 mo After Randomization (12-mo Follow-Up) in Male and Female Patients Presenting With ACS

|                                      | Male patients              |                         |                       |         |                                    | Female patients            |                       |                       |         |                                    | interaction p-value |
|--------------------------------------|----------------------------|-------------------------|-----------------------|---------|------------------------------------|----------------------------|-----------------------|-----------------------|---------|------------------------------------|---------------------|
|                                      | Abbreviated DAPT (n = 758) | Standard DAPT (n = 719) | Hazard ratio (95% CI) | P-value | Com-Nogue Risk Difference (95% CI) | Abbreviated DAPT (n = 370) | Standard DAPT (n=364) | Hazard ratio (95% CI) | p-value | Com-Nogue Risk Difference (95% CI) |                     |
| NACE                                 | 68 (9.01)                  | 61 (8.54)               | 1.05 (0.74-1.49)      | 0.774   | 0.46 (-2.43 to 3.36)               | 28 (7.57)                  | 39 (10.73)            | 0.69 (0.42-1.12)      | 0.132   | -3.16 (-7.33 to 1.01)              | 0.165               |
| MACCE                                | 60 (7.95)                  | 47 (6.59)               | 1.21 (0.83-1.78)      | 0.320   | 1.36 (-1.29 to 4.01)               | 22 (5.95)                  | 37 (10.18)            | 0.57 (0.33-0.96)      | 0.034   | -4.23 (-8.16 to -0.30)             | 0.022               |
| MCB                                  | 46 (6.19)                  | 62 (8.76)               | 0.69 (0.47-1.01)      | 0.055   | -2.58 (-5.29 to 0.13)              | 23 (6.29)                  | 30 (8.47)             | 0.73 (0.42-1.26)      | 0.259   | -2.18 (-6.00 to 1.64)              | 0.853               |
| Death                                | 32 (4.24)                  | 27 (3.79)               | 1.12 (0.67-1.87)      | 0.666   | 0.46 (-1.55 to 2.46)               | 13 (3.51)                  | 22 (6.05)             | 0.57 (0.29-1.13)      | 0.109   | -2.54 (-5.62 to 0.55)              | 0.123               |
| Cardiovascular death                 | 14 (1.87)                  | 14 (1.98)               | 0.94 (0.45-1.98)      | 0.880   | -0.11 (-1.52 to 1.31)              | 7 (1.91)                   | 11 (3.07)             | 0.62 (0.24-1.59)      | 0.315   | -1.16 (-3.43 to 1.11)              | 0.484               |
| Non-cardiovascular death             | 13 (1.75)                  | 11 (1.56)               | 1.12 (0.50-2.49)      | 0.788   | 0.19 (-1.12 to 1.51)               | 5 (1.37)                   | 6 (1.69)              | 0.80 (0.25-2.63)      | 0.718   | -0.32 (-2.11 to 1.48)              | 0.653               |
| Undetermined death                   | 5 (0.67)                   | 2 (0.29)                | 2.36 (0.46-12.16)     | 0.305   | 0.39 (-0.32 to 1.10)               | 1 (0.27)                   | 5 (1.42)              | 0.19 (0.02-1.65)      | 0.133   | -1.15 (-2.49 to 0.20)              | 0.069               |
| Cardiovascular or Undetermined death | 19 (2.53)                  | 16 (2.26)               | 1.12 (0.58-2.18)      | 0.735   | 0.27 (-1.30 to 1.84)               | 8 (2.17)                   | 16 (4.44)             | 0.48 (0.21-1.13)      | 0.093   | -2.27 (-4.86 to 0.33)              | 0.126               |
| Cerebrovascular Accident             | 6 (0.82)                   | 11 (1.58)               | 0.51 (0.19-1.39)      | 0.189   | -0.76 (-1.89 to 0.37)              | 1 (0.28)                   | 7 (1.98)              | 0.14 (0.02-1.11)      | 0.063   | -1.70 (-3.25 to -0.15)             | 0.263               |
| Stroke¶                              | 4 (0.54)                   | 7 (1.00)                | 0.54 (0.16-1.84)      | 0.326   | -0.46 (-1.37 to 0.45)              | 1 (0.28)                   | 4 (1.13)              | 0.24 (0.03-2.15)      | 0.203   | -0.86 (-2.08 to 0.37)              | 0.528               |
| ischemic                             | 3 (0.40)                   | 4 (0.57)                | 0.71 (0.16-3.17)      | 0.653   | -0.17 (-0.89 to 0.55)              | 1 (0.28)                   | 4 (1.13)              | 0.24 (0.03-2.15)      | 0.203   | -0.86 (-2.08 to 0.37)              | 0.426               |
| hemorrhagic                          | 1 (0.14)                   | 3 (0.43)                | 0.31 (0.03-3.02)      | 0.316   | -0.29 (-0.85 to 0.26)              | 0 (0.00)                   | 0 (0.00)              |                       |         |                                    |                     |
| TIA                                  | 2 (0.28)                   | 4 (0.58)                | 0.47 (0.09-2.57)      | 0.384   | -0.30 (-0.98 to 0.38)              | 0 (0.00)                   | 3 (0.85)              | 0.14 (0.01-2.70)      | 0.121   | -0.85 (-1.80 to 0.11)              | 1.000               |
| Myocardial infarction                | 31 (4.18)                  | 20 (2.85)               | 1.47 (0.84-2.59)      | 0.176   | 1.33 (-0.57 to 3.22)               | 8 (2.21)                   | 14 (3.97)             | 0.55 (0.23-1.30)      | 0.172   | -1.76 (-4.30 to 0.78)              | 0.060               |
| Definite or Probable ST              | 9 (1.22)                   | 3 (0.43)                | 2.84 (0.77-10.50)     | 0.117   | 0.79 (-0.14 to 1.72)               | 2 (0.55)                   | 4 (1.14)              | 0.48 (0.09-2.64)      | 0.401   | -0.59 (-1.94 to 0.75)              | 0.105               |
| Definite ST                          | 7 (0.95)                   | 2 (0.29)                | 3.32 (0.69-15.96)     | 0.135   | 0.66 (-0.14 to 1.47)               | 1 (0.27)                   | 3 (0.87)              | 0.32 (0.03-3.08)      | 0.324   | -0.59 (-1.71 to 0.52)              | 0.097               |

|                              |           |           |                   |       |                        |           |           |                   |       |                       |       |
|------------------------------|-----------|-----------|-------------------|-------|------------------------|-----------|-----------|-------------------|-------|-----------------------|-------|
| Probable ST                  | 2 (0.27)  | 1 (0.15)  | 1.89 (0.17-20.82) | 0.604 | 0.13 (-0.34 to 0.60)   | 1 (0.27)  | 1 (0.28)  | 0.97 (0.06-15.58) | 0.985 | -0.01 (-0.76 to 0.75) | 0.720 |
| Bleeding BARC classification |           |           |                   |       |                        |           |           |                   |       |                       |       |
| Type 1                       | 17 (2.28) | 41 (5.80) | 0.39 (0.22-0.68)  | 0.001 | -3.53 (-5.56 to -1.50) | 13 (3.56) | 15 (4.19) | 0.83 (0.40-1.75)  | 0.626 | -0.63 (-3.45 to 2.18) | 0.108 |
| Type 2                       | 31 (4.18) | 39 (5.55) | 0.74 (0.46-1.19)  | 0.216 | -1.36 (-3.59 to 0.86)  | 15 (4.12) | 25 (7.09) | 0.57 (0.30-1.08)  | 0.083 | -2.98 (-6.35 to 0.39) | 0.515 |
| Type 3                       | 16 (2.15) | 19 (2.69) | 0.79 (0.41-1.54)  | 0.491 | -0.53 (-2.12 to 1.05)  | 9 (2.46)  | 7 (1.98)  | 1.25 (0.46-3.35)  | 0.661 | 0.48 (-1.67 to 2.63)  | 0.452 |
| Type 3a                      | 9 (1.21)  | 14 (1.98) | 0.61 (0.26-1.40)  | 0.240 | -0.77 (-2.06 to 0.52)  | 3 (0.82)  | 4 (1.13)  | 0.72 (0.16-3.24)  | 0.673 | -0.31 (-1.75 to 1.12) | 0.835 |
| Type 3b                      | 5 (0.68)  | 3 (0.42)  | 1.57 (0.38-6.58)  | 0.536 | 0.26 (-0.50 to 1.02)   | 6 (1.64)  | 3 (0.85)  | 1.94 (0.49-7.76)  | 0.348 | 0.80 (-0.82 to 2.41)  | 0.834 |
| Type 3c                      | 2 (0.27)  | 2 (0.29)  | 0.95 (0.13-6.73)  | 0.957 | -0.02 (-0.56 to 0.52)  | 0 (0.00)  | 0 (0.00)  |                   |       |                       |       |
| Type 4                       | 0 (0.00)  | 0 (0.00)  |                   |       |                        | 0 (0.00)  | 0 (0.00)  |                   |       |                       |       |
| Type 5                       | 2 (0.28)  | 5 (0.71)  | 0.38 (0.07-1.95)  | 0.245 | -0.44 (-1.17 to 0.29)  | 0 (0.00)  | 0 (0.00)  |                   |       |                       |       |
| Type 5a                      | 0 (0.00)  | 1 (0.14)  | 0.32 (0.01-7.84)  | 0.487 | -0.14 (-0.41 to 0.13)  | 0 (0.00)  | 0 (0.00)  |                   |       |                       |       |
| Type 5b                      | 2 (0.28)  | 4 (0.57)  | 0.47 (0.09-2.57)  | 0.385 | -0.30 (-0.98 to 0.38)  | 0 (0.00)  | 0 (0.00)  |                   |       |                       |       |
| Type 3 or 5                  | 18 (2.43) | 24 (3.39) | 0.70 (0.38-1.30)  | 0.262 | -0.96 (-2.70 to 0.77)  | 9 (2.46)  | 7 (1.98)  | 1.25 (0.46-3.35)  | 0.661 | 0.48 (-1.67 to 2.63)  | 0.333 |

Abbreviations: BARC, Bleeding Academic Research Consortium; CI, confidence interval; MACCE, major adverse cardiac and cerebral events; MCB, major or clinically relevant non-major bleeding; NACE, net adverse clinical events; ST, stent thrombosis; TIA, transient ischemic attack.

Nr of first events of each type (Kaplan-Meier failure %). Hazard ratio (95% CI) from Cox's time-to-first event analyses in ITT population. Continuity corrected risk ratios (95% CI) in case of zero events with Fisher's exact test p-value. Interaction p-value testing for modifying effect of Gender (males or females) on the hazard ratio scale.

¶includes undetermined Strokes.

**eTable 8.** Clinical Outcomes at 11 mo After Randomization (12-mo Follow-Up) in Male and Female Patients Presenting With ACS or Who Had Complex PCI

|                                      | Male patients              |                         |                       |         |                                    | Female patients            |                         |                       |         |                                    | interaction p-value |
|--------------------------------------|----------------------------|-------------------------|-----------------------|---------|------------------------------------|----------------------------|-------------------------|-----------------------|---------|------------------------------------|---------------------|
|                                      | Abbreviated DAPT (N = 982) | Standard DAPT (N = 947) | Hazard ratio (95% CI) | p-value | Com-Nogue Risk Difference (95% CI) | Abbreviated DAPT (N = 451) | Standard DAPT (N = 456) | Hazard ratio (95% CI) | p-value | Com-Nogue Risk Difference (95% CI) |                     |
| NACE                                 | 86 (8.79)                  | 78 (8.28)               | 1.06 (0.78-1.44)      | 0.715   | 0.50 [-2.00 to 3.00]               | 31 (6.89)                  | 43 (9.44)               | 0.71 (0.45-1.13)      | 0.152   | -2.55 [-6.11 to 1.01]              | 0.165               |
| MACCE                                | 76 (7.77)                  | 58 (6.16)               | 1.27 (0.90-1.79)      | 0.172   | 1.60 [-0.67 to 3.88]               | 24 (5.33)                  | 39 (8.56)               | 0.61 (0.36-1.01)      | 0.054   | -3.23 [-6.53 to 0.08]              | 0.018               |
| MCB                                  | 60 (6.22)                  | 83 (8.87)               | 0.68 (0.49-0.95)      | 0.024   | -2.65 [-5.03 to -0.28]             | 26 (5.84)                  | 34 (7.61)               | 0.75 (0.45-1.25)      | 0.276   | -1.78 [-5.06 to 1.51]              | 0.741               |
| Death                                | 39 (3.99)                  | 32 (3.40)               | 1.17 (0.74-1.87)      | 0.502   | 0.59 [-1.10 to 2.27]               | 13 (2.89)                  | 23 (5.05)               | 0.56 (0.29-1.11)      | 0.099   | -2.16 [-4.70 to 0.38]              | 0.082               |
| Cardiovascular death                 | 17 (1.75)                  | 15 (1.61)               | 1.09 (0.55-2.19)      | 0.805   | 0.15 [-1.01 to 1.30]               | 7 (1.57)                   | 12 (2.66)               | 0.58 (0.23-1.48)      | 0.256   | -1.10 [-2.98 to 0.78]              | 0.289               |
| Non-cardiovascular death             | 15 (1.56)                  | 14 (1.50)               | 1.03 (0.50-2.14)      | 0.932   | 0.05 [-1.05 to 1.16]               | 5 (1.12)                   | 6 (1.34)                | 0.83 (0.25-2.72)      | 0.760   | -0.22 [-1.66 to 1.23]              | 0.760               |
| Undetermined death                   | 7 (0.73)                   | 3 (0.33)                | 2.25 (0.58-8.68)      | 0.241   | 0.40 [-0.25 to 1.06]               | 1 (0.22)                   | 5 (1.13)                | 0.20 (0.02-1.71)      | 0.141   | -0.90 [-1.98 to 0.17]              | 0.061               |
| Cardiovascular or Undetermined death | 24 (2.47)                  | 18 (1.93)               | 1.28 (0.70-2.37)      | 0.423   | 0.54 [-0.77 to 1.86]               | 8 (1.79)                   | 17 (3.76)               | 0.47 (0.20-1.09)      | 0.078   | -1.97 [-4.11 to 0.17]              | 0.058               |
| Cerebrovascular Accident             | 8 (0.84)                   | 11 (1.19)               | 0.70 (0.28-1.74)      | 0.442   | -0.35 [-1.26 to 0.56]              | 2 (0.45)                   | 9 (2.03)                | 0.22 (0.05-1.02)      | 0.053   | -1.57 [-3.02 to -0.12]             | 0.203               |
| Stroke¶                              | 6 (0.63)                   | 7 (0.76)                | 0.83 (0.28-2.46)      | 0.732   | -0.13 [-0.88 to 0.62]              | 2 (0.45)                   | 6 (1.35)                | 0.33 (0.07-1.64)      | 0.176   | -0.90 [-2.15 to 0.35]              | 0.355               |
| ischemic                             | 5 (0.52)                   | 4 (0.43)                | 1.21 (0.32-4.49)      | 0.781   | 0.09 [-0.53 to 0.71]               | 2 (0.45)                   | 6 (1.35)                | 0.33 (0.07-1.64)      | 0.176   | -0.90 [-2.15 to 0.35]              | 0.222               |
| hemorrhagic                          | 1 (0.11)                   | 3 (0.32)                | 0.32 (0.03-3.09)      | 0.325   | -0.22 [-0.64 to 0.20]              | 0 (0.00)                   | 0 (0.00)                |                       |         |                                    |                     |
| TIA                                  | 2 (0.21)                   | 4 (0.43)                | 0.48 (0.09-2.62)      | 0.397   | -0.22 [-0.74 to 0.30]              | 0 (0.00)                   | 3 (0.67)                | 0.14 (0.01-2.70)      | 0.249   | -0.67 [-1.43 to 0.09]              |                     |
| Myocardial infarction                | 38 (3.95)                  | 26 (2.80)               | 1.41 (0.86-2.33)      | 0.173   | 1.15 [-0.48 to 2.77]               | 9 (2.04)                   | 15 (3.38)               | 0.59 (0.26-1.36)      | 0.216   | -1.34 [-3.47 to 0.80]              | 0.078               |
| Definite or Probable ST              | 10 (1.04)                  | 4 (0.43)                | 2.41 (0.76-7.70)      | 0.136   | 0.61 [-0.16 to 1.38]               | 2 (0.45)                   | 4 (0.90)                | 0.50 (0.09-2.73)      | 0.423   | -0.46 [-1.53 to 0.62]              | 0.133               |

|                              |           |           |                   |       |                        |           |           |                   |       |                       |       |
|------------------------------|-----------|-----------|-------------------|-------|------------------------|-----------|-----------|-------------------|-------|-----------------------|-------|
| Definite ST                  | 8 (0.83)  | 3 (0.32)  | 2.58 (0.68-9.71)  | 0.162 | 0.51 [-0.17 to 1.19]   | 1 (0.23)  | 3 (0.69)  | 0.33 (0.03-3.18)  | 0.338 | -0.46 [-1.35 to 0.43] | 0.126 |
| Probable ST                  | 2 (0.21)  | 1 (0.11)  | 1.93 (0.17-21.25) | 0.592 | 0.10 [-0.26 to 0.46]   | 1 (0.22)  | 1 (0.22)  | 1.01 (0.06-16.08) | 0.997 | 0.00 [-0.61 to 0.61]  | 0.725 |
| Bleeding BARC classification |           |           |                   |       |                        |           |           |                   |       |                       |       |
| Type 1                       | 26 (2.69) | 52 (5.57) | 0.48 (0.30-0.76)  | 0.002 | -2.88 [-4.68 to -1.09] | 14 (3.14) | 20 (4.47) | 0.69 (0.35-1.37)  | 0.292 | -1.33 [-3.84 to 1.18] | 0.375 |
| Type 2                       | 42 (4.36) | 57 (6.12) | 0.70 (0.47-1.04)  | 0.079 | -1.76 [-3.76 to 0.25]  | 17 (3.82) | 27 (6.07) | 0.62 (0.34-1.13)  | 0.120 | -2.25 [-5.09 to 0.60] | 0.747 |
| Type 3                       | 20 (2.07) | 25 (2.68) | 0.77 (0.43-1.38)  | 0.372 | -0.60 [-1.97 to 0.77]  | 10 (2.25) | 9 (2.02)  | 1.11 (0.45-2.73)  | 0.820 | 0.23 [-1.67 to 2.13]  | 0.495 |
| Type 3a                      | 12 (1.24) | 18 (1.93) | 0.64 (0.31-1.33)  | 0.229 | -0.68 [-1.81 to 0.44]  | 4 (0.90)  | 5 (1.12)  | 0.80 (0.21-2.97)  | 0.735 | -0.22 [-1.53 to 1.09] | 0.770 |
| Type 3b                      | 6 (0.63)  | 4 (0.43)  | 1.44 (0.41-5.11)  | 0.570 | 0.20 [-0.46 to 0.85]   | 6 (1.35)  | 4 (0.90)  | 1.50 (0.42-5.32)  | 0.529 | 0.45 [-0.93 to 1.83]  | 0.964 |
| Type 3c                      | 3 (0.31)  | 3 (0.32)  | 0.96 (0.19-4.77)  | 0.964 | -0.01 [-0.52 to 0.50]  | 0 (0.00)  | 0 (0.00)  |                   |       |                       |       |
| Type 4                       | 0 (0.00)  | 0 (0.00)  |                   |       |                        | 0 (0.00)  | 0 (0.00)  |                   |       |                       |       |
| Type 5                       | 2 (0.21)  | 5 (0.54)  | 0.39 (0.07-1.99)  | 0.254 | -0.33 [-0.88 to 0.23]  | 0 (0.00)  | 0 (0.00)  |                   |       |                       |       |
| Type 5a                      | 0 (0.00)  | 1 (0.11)  | 0.32 (0.01-7.85)  | 0.491 | -0.11 [-0.31 to 0.10]  | 0 (0.00)  | 0 (0.00)  |                   |       |                       |       |
| Type 5b                      | 2 (0.21)  | 4 (0.43)  | 0.48 (0.09-2.63)  | 0.398 | -0.22 [-0.74 to 0.29]  | 0 (0.00)  | 0 (0.00)  |                   |       |                       |       |
| Type 3 or 5                  | 22 (2.28) | 30 (3.21) | 0.70 (0.40-1.22)  | 0.206 | -0.92 [-2.40 to 0.55]  | 10 (2.25) | 9 (2.02)  | 1.11 (0.45-2.73)  | 0.820 | 0.23 [-1.67 to 2.13]  | 0.391 |

Abbreviations: BARC, Bleeding Academic Research Consortium; CI, confidence interval; MACCE, major adverse cardiac and cerebral events; MCB, major or clinically relevant non-major bleeding; NACE, net adverse clinical events; ST, stent thrombosis; TIA, transient ischemic attack.

Nr of first events of each type (Kaplan-Meier failure %). Hazard ratio (95% CI) from Cox's time-to-first event analyses in ITT population. Continuity corrected risk ratios (95% CI) in case of zero events with Fisher's exact test p-value. Interaction p-value testing for modifying effect of Gender (males or females) on the hazard ratio scale.

¶includes undetermined Strokes.

**eTable 9.** Clinical Outcomes at 11 mo After Randomization (12-mo Follow-Up) in Male and Female Patients With Clinical Indication for 12-mo OAC

|                                      | Male patients            |                       |                       |         |                                    | Female patients          |                       |                       |         |                                    |                     |
|--------------------------------------|--------------------------|-----------------------|-----------------------|---------|------------------------------------|--------------------------|-----------------------|-----------------------|---------|------------------------------------|---------------------|
|                                      | Abbreviated DAPT (n=636) | Standard DAPT (n=612) | Hazard ratio (95% CI) | p-value | Com-Nogue Risk Difference (95% CI) | Abbreviated DAPT (n=212) | Standard DAPT (n=206) | Hazard ratio (95% CI) | p-value | Com-Nogue Risk Difference (95% CI) | interaction p-value |
| NACE                                 | 48 (7.58)                | 58 (9.54)             | 0.78 (0.53-1.14)      | 0.204   | -1.97 (-5.08 to 1.15)              | 20 (9.43)                | 20 (9.83)             | 0.97 (0.52-1.80)      | 0.914   | -0.39 (-6.07 to 5.28)              | 0.562               |
| MACCE                                | 38 (6.00)                | 37 (6.09)             | 0.98 (0.62-1.54)      | 0.936   | -0.09 (-2.75 to 2.56)              | 12 (5.67)                | 17 (8.36)             | 0.67 (0.32-1.40)      | 0.288   | -2.69 (-7.61 to 2.22)              | 0.389               |
| MCB                                  | 59 (9.40)                | 74 (12.23)            | 0.75 (0.53-1.05)      | 0.095   | -2.83 (-6.30 to 0.64)              | 24 (11.40)               | 20 (9.93)             | 1.15 (0.64-2.08)      | 0.644   | 1.47 (-4.49 to 7.43)               | 0.217               |
| Death                                | 23 (3.64)                | 23 (3.79)             | 0.96 (0.54-1.71)      | 0.884   | -0.15 (-2.26 to 1.95)              | 8 (3.78)                 | 10 (4.92)             | 0.77 (0.30-1.95)      | 0.578   | -1.14 (-5.07 to 2.79)              | 0.691               |
| Cardiovascular death                 | 12 (1.91)                | 16 (2.66)             | 0.72 (0.34-1.52)      | 0.386   | -0.74 (-2.42 to 0.93)              | 4 (1.91)                 | 5 (2.47)              | 0.77 (0.21-2.87)      | 0.697   | -0.56 (-3.39 to 2.27)              | 0.932               |
| Non-cardiovascular death             | 8 (1.28)                 | 5 (0.84)              | 1.53 (0.50-4.68)      | 0.454   | 0.44 (-0.70 to 1.59)               | 3 (1.44)                 | 2 (1.01)              | 1.44 (0.24-8.61)      | 0.690   | 0.43 (-1.70 to 2.56)               | 0.953               |
| Undetermined death                   | 3 (0.48)                 | 2 (0.33)              | 1.44 (0.24-8.61)      | 0.690   | 0.16 (-0.55 to 0.86)               | 1 (0.47)                 | 3 (1.51)              | 0.32 (0.03-3.07)      | 0.322   | -1.04 (-2.97 to 0.89)              | 0.308               |
| Cardiovascular or Undetermined death | 15 (2.39)                | 18 (2.98)             | 0.80 (0.40-1.58)      | 0.519   | -0.59 (-2.39 to 1.22)              | 5 (2.37)                 | 8 (3.94)              | 0.60 (0.20-1.84)      | 0.371   | -1.57 (-4.95 to 1.80)              | 0.669               |
| Cerebrovascular Accident             | 2 (0.32)                 | 10 (1.67)             | 0.19 (0.04-0.87)      | 0.033   | -1.34 (-2.46 to -0.23)             | 1 (0.47)                 | 3 (1.50)              | 0.32 (0.03-3.07)      | 0.322   | -1.03 (-2.95 to 0.89)              | 0.710               |
| Stroke¶                              | 1 (0.16)                 | 8 (1.33)              | 0.12 (0.01-0.96)      | 0.045   | -1.17 (-2.14 to -0.21)             | 1 (0.47)                 | 2 (0.99)              | 0.48 (0.04-5.30)      | 0.550   | -0.52 (-2.17 to 1.13)              | 0.390               |
| ischemic                             | 1 (0.16)                 | 7 (1.17)              | 0.14 (0.02-1.11)      | 0.063   | -1.01 (-1.92 to -0.09)             | 1 (0.47)                 | 2 (0.99)              | 0.48 (0.04-5.30)      | 0.550   | -0.52 (-2.17 to 1.13)              | 0.439               |
| hemorrhagic                          | 0 (0.00)                 | 2 (0.34)              | 0.19 (0.01-3.95)      | 0.240   | -0.34 (-0.80 to 0.13)              | 0 (0.00)                 | 0 (0.00)              |                       |         |                                    | 1.000               |
| TIA                                  | 1 (0.16)                 | 2 (0.33)              | 0.48 (0.04-5.28)      | 0.548   | -0.17 (-0.73 to 0.39)              | 0 (0.00)                 | 1 (0.51)              | 0.32 (0.01-7.81)      | 0.493   | -0.51 (-1.51 to 0.49)              |                     |
| Myocardial infarction                | 15 (2.41)                | 11 (1.84)             | 1.31 (0.60-2.86)      | 0.494   | 0.57 (-1.04 to 2.19)               | 4 (1.93)                 | 6 (3.01)              | 0.64 (0.18-2.25)      | 0.482   | -1.08 (-4.10 to 1.95)              | 0.340               |
| Definite or Probable ST              | 1 (0.16)                 | 3 (0.50)              | 0.32 (0.03-3.07)      | 0.323   | -0.34 (-0.99 to 0.31)              | 2 (0.96)                 | 1 (0.51)              | 1.92 (0.17-21.16)     | 0.595   | 0.45 (-1.21 to 2.12)               | 0.287               |

|                              |           |           |                   |       |                        |           |           |                   |       |                       |       |
|------------------------------|-----------|-----------|-------------------|-------|------------------------|-----------|-----------|-------------------|-------|-----------------------|-------|
| Definite ST                  | 0 (0.00)  | 2 (0.33)  | 0.19 (0.01-3.95)  | 0.240 | -0.33 (-0.80 to 0.13)  | 2 (0.96)  | 1 (0.51)  | 1.92 (0.17-21.16) | 0.595 | 0.45 (-1.21 to 2.12)  |       |
| Probable ST                  | 1 (0.16)  | 1 (0.17)  | 0.96 (0.06-15.35) | 0.977 | -0.01 (-0.47 to 0.45)  | 0 (0.00)  | 0 (0.00)  |                   |       |                       | 1.000 |
| Bleeding BARC classification |           |           |                   |       |                        |           |           |                   |       |                       |       |
| Type 1                       | 25 (4.00) | 34 (5.66) | 0.70 (0.42-1.17)  | 0.174 | -1.66 (-4.06 to 0.74)  | 9 (4.29)  | 13 (6.37) | 0.65 (0.28-1.53)  | 0.326 | -2.08 (-6.41 to 2.25) | 0.878 |
| Type 2                       | 46 (7.33) | 48 (7.95) | 0.91 (0.61-1.36)  | 0.647 | -0.62 (-3.59 to 2.35)  | 14 (6.67) | 17 (8.43) | 0.78 (0.38-1.58)  | 0.489 | -1.76 (-6.87 to 3.36) | 0.709 |
| Type 3                       | 16 (2.56) | 27 (4.47) | 0.56 (0.30-1.04)  | 0.067 | -1.91 (-3.97 to 0.15)  | 10 (4.77) | 6 (3.01)  | 1.63 (0.59-4.47)  | 0.347 | 1.76 (-1.98 to 5.49)  | 0.079 |
| Type 3a                      | 8 (1.28)  | 13 (2.15) | 0.59 (0.24-1.42)  | 0.237 | -0.87 (-2.33 to 0.59)  | 3 (1.42)  | 5 (2.50)  | 0.57 (0.14-2.40)  | 0.447 | -1.09 (-3.77 to 1.60) | 0.984 |
| Type 3b                      | 7 (1.12)  | 11 (1.83) | 0.61 (0.23-1.56)  | 0.300 | -0.70 (-2.06 to 0.65)  | 6 (2.88)  | 1 (0.51)  | 5.85 (0.70-48.59) | 0.102 | 2.37 (-0.11 to 4.85)  | 0.055 |
| Type 3c                      | 2 (0.32)  | 3 (0.50)  | 0.64 (0.11-3.82)  | 0.623 | -0.18 (-0.90 to 0.54)  | 1 (0.48)  | 0 (0.00)  | 2.92 (0.12-71.27) | 1.000 | 0.48 (-0.46 to 1.43)  |       |
| Type 4                       | 0 (0.00)  | 0 (0.00)  |                   |       |                        | 0 (0.00)  | 0 (0.00)  |                   |       |                       |       |
| Type 5                       | 1 (0.16)  | 3 (0.51)  | 0.32 (0.03-3.07)  | 0.323 | -0.34 (-1.00 to 0.31)  | 0 (0.00)  | 0 (0.00)  |                   |       |                       |       |
| Type 5a                      | 0 (0.00)  | 1 (0.17)  | 0.32 (0.01-7.84)  | 0.490 | -0.17 (-0.51 to 0.16)  | 0 (0.00)  | 0 (0.00)  |                   |       |                       |       |
| Type 5b                      | 1 (0.16)  | 2 (0.34)  | 0.48 (0.04-5.29)  | 0.548 | -0.17 (-0.73 to 0.39)  | 0 (0.00)  | 0 (0.00)  |                   |       |                       |       |
| Type 3 or 5                  | 17 (2.72) | 30 (4.97) | 0.54 (0.30-0.97)  | 0.040 | -2.25 (-4.40 to -0.09) | 10 (4.77) | 6 (3.01)  | 1.63 (0.59-4.47)  | 0.347 | 1.76 (-1.98 to 5.49)  | 0.064 |

*Abbreviations: BARC, Bleeding Academic Research Consortium; CI, confidence interval; MACCE, major adverse cardiac and cerebral events; MCB, major or clinically relevant non-major bleeding; NACE, net adverse clinical events; ST, stent thrombosis; TIA, transient ischemic attack.*

Nr of first events of each type (Kaplan-Meier failure %). Hazard ratio (95% CI) from Cox's time-to-first event analyses in ITT population. Continuity corrected risk ratios (95% CI) in case of zero events with Fisher's exact test p-value. Interaction p-value testing for modifying effect of Gender (males or females) on the hazard ratio scale.

¶includes undetermined Strokes.

**eTable 10.** Clinical Outcomes at 11 mo After Randomization (12-mo Follow-Up) in Male and Female Patients Without Clinical Indication for 12-mo OAC

|                                      | Male patients              |                       |                       |         |                                    | Female patients          |                       |                       |         |                                    |                     |
|--------------------------------------|----------------------------|-----------------------|-----------------------|---------|------------------------------------|--------------------------|-----------------------|-----------------------|---------|------------------------------------|---------------------|
|                                      | Abbreviated DAPT (n = 954) | Standard DAPT (n=969) | Hazard ratio (95% CI) | p-value | Com-Nogue Risk Difference (95% CI) | Abbreviated DAPT (n=493) | Standard DAPT (n=497) | Hazard ratio (95% CI) | p-value | Com-Nogue Risk Difference (95% CI) | interaction p-value |
| NACE                                 | 72 (7.58)                  | 65 (6.73)             | 1.13 (0.81-1.58)      | 0.470   | 0.85 (-1.46 to 3.16)               | 32 (6.53)                | 39 (7.85)             | 0.82 (0.51-1.31)      | 0.401   | -1.32 (-4.54 to 1.90)              | 0.269               |
| MACCE                                | 66 (6.95)                  | 52 (5.39)             | 1.30 (0.91-1.87)      | 0.153   | 1.56 (-0.59 to 3.72)               | 22 (4.49)                | 32 (6.44)             | 0.68 (0.40-1.18)      | 0.170   | -1.95 (-4.78 to 0.88)              | 0.053               |
| MCB                                  | 41 (4.38)                  | 76 (7.94)             | 0.54 (0.37-0.78)      | 0.001   | -3.56 (-5.72 to -1.41)             | 24 (4.94)                | 41 (8.37)             | 0.58 (0.35-0.95)      | 0.032   | -3.44 (-6.56 to -0.32)             | 0.830               |
| Death                                | 32 (3.37)                  | 29 (3.01)             | 1.12 (0.68-1.86)      | 0.652   | 0.36 (-1.21 to 1.94)               | 12 (2.45)                | 19 (3.82)             | 0.63 (0.31-1.30)      | 0.214   | -1.37 (-3.55 to 0.80)              | 0.201               |
| Cardiovascular death                 | 14 (1.49)                  | 12 (1.25)             | 1.19 (0.55-2.57)      | 0.663   | 0.24 (-0.81 to 1.28)               | 7 (1.44)                 | 11 (2.24)             | 0.64 (0.25-1.64)      | 0.352   | -0.80 (-2.48 to 0.88)              | 0.319               |
| Non-cardiovascular death             | 13 (1.39)                  | 15 (1.57)             | 0.88 (0.42-1.85)      | 0.740   | -0.18 (-1.27 to 0.90)              | 5 (1.03)                 | 6 (1.22)              | 0.83 (0.25-2.73)      | 0.765   | -0.19 (-1.51 to 1.13)              | 0.937               |
| Undetermined death                   | 5 (0.53)                   | 2 (0.21)              | 2.54 (0.49-13.10)     | 0.265   | 0.32 (-0.23 to 0.87)               | 0 (0.00)                 | 2 (0.41)              | 0.20 (0.01-4.16)      | 0.500   | -0.41 (-0.97 to 0.16)              |                     |
| Cardiovascular or Undetermined death | 19 (2.01)                  | 14 (1.46)             | 1.38 (0.69-2.75)      | 0.360   | 0.55 (-0.62 to 1.73)               | 7 (1.44)                 | 13 (2.64)             | 0.54 (0.22-1.35)      | 0.188   | -1.20 (-2.96 to 0.57)              | 0.109               |
| Cerebrovascular Accident             | 9 (0.96)                   | 9 (0.95)              | 1.02 (0.40-2.56)      | 0.970   | 0.02 (-0.86 to 0.90)               | 5 (1.03)                 | 10 (2.05)             | 0.50 (0.17-1.46)      | 0.205   | -1.02 (-2.57 to 0.52)              | 0.324               |
| Stroke¶                              | 7 (0.75)                   | 6 (0.63)              | 1.19 (0.40-3.54)      | 0.755   | 0.12 (-0.63 to 0.86)               | 3 (0.62)                 | 7 (1.44)              | 0.43 (0.11-1.66)      | 0.220   | -0.83 (-2.10 to 0.45)              | 0.250               |
| ischemic                             | 6 (0.64)                   | 2 (0.21)              | 3.06 (0.62-15.16)     | 0.171   | 0.43 (-0.16 to 1.01)               | 3 (0.62)                 | 7 (1.44)              | 0.43 (0.11-1.66)      | 0.220   | -0.83 (-2.10 to 0.45)              | 0.066               |
| hemorrhagic                          | 1 (0.11)                   | 3 (0.31)              | 0.34 (0.04-3.26)      | 0.349   | -0.21 (-0.62 to 0.21)              | 0 (0.00)                 | 0 (0.00)              |                       |         |                                    | 1.000               |
| TIA                                  | 2 (0.22)                   | 3 (0.32)              | 0.68 (0.11-4.05)      | 0.669   | -0.10 (-0.57 to 0.37)              | 2 (0.41)                 | 3 (0.61)              | 0.67 (0.11-4.01)      | 0.661   | -0.20 (-1.09 to 0.69)              | 0.991               |
| Myocardial infarction                | 34 (3.62)                  | 21 (2.20)             | 1.66 (0.96-2.86)      | 0.068   | 1.42 (-0.09 to 2.94)               | 7 (1.45)                 | 11 (2.26)             | 0.63 (0.25-1.63)      | 0.344   | -0.81 (-2.51 to 0.89)              | 0.085               |
| Definite or Probable ST              | 10 (1.07)                  | 2 (0.21)              | 5.10 (1.12-23.28)     | 0.035   | 0.86 (0.14 to 1.58)                | 1 (0.20)                 | 3 (0.62)              | 0.33 (0.03-3.22)      | 0.343   | -0.41 (-1.21 to 0.39)              | 0.050               |

|                              |           |           |                   |       |                        |           |           |                   |       |                        |       |
|------------------------------|-----------|-----------|-------------------|-------|------------------------|-----------|-----------|-------------------|-------|------------------------|-------|
| Definite ST                  | 9 (0.96)  | 2 (0.21)  | 4.59 (0.99-21.25) | 0.051 | 0.75 (0.07 to 1.44)    | 0 (0.00)  | 2 (0.42)  | 0.20 (0.01-4.16)  | 0.500 | -0.42 (-0.99 to 0.16)  |       |
| Probable ST                  | 1 (0.11)  | 0 (0.00)  | 3.05 (0.12-74.78) | 0.496 | 0.11 (-0.10 to 0.31)   | 1 (0.20)  | 1 (0.20)  | 1.01 (0.06-16.13) | 0.995 | 0.00 (-0.56 to 0.56)   | 0.000 |
| Bleeding BARC classification |           |           |                   |       |                        |           |           |                   |       |                        |       |
| Type 1                       | 20 (2.12) | 42 (4.38) | 0.48 (0.28-0.82)  | 0.007 | -2.26 (-3.84 to -0.67) | 11 (2.26) | 20 (4.09) | 0.55 (0.26-1.14)  | 0.106 | -1.83 (-4.03 to 0.36)  | 0.781 |
| Type 2                       | 28 (2.99) | 56 (5.86) | 0.50 (0.32-0.79)  | 0.003 | -2.87 (-4.72 to -1.02) | 14 (2.88) | 31 (6.35) | 0.44 (0.24-0.83)  | 0.012 | -3.47 (-6.10 to -0.84) | 0.764 |
| Type 3                       | 15 (1.60) | 15 (1.57) | 1.01 (0.50-2.07)  | 0.971 | 0.03 (-1.09 to 1.16)   | 12 (2.47) | 11 (2.25) | 1.09 (0.48-2.48)  | 0.829 | 0.23 (-1.68 to 2.13)   | 0.891 |
| Type 3a                      | 10 (1.07) | 9 (0.94)  | 1.13 (0.46-2.78)  | 0.793 | 0.13 (-0.77 to 1.03)   | 5 (1.03)  | 3 (0.61)  | 1.67 (0.40-7.00)  | 0.481 | 0.43 (-0.70 to 1.56)   | 0.650 |
| Type 3b                      | 4 (0.43)  | 1 (0.11)  | 4.07 (0.46-36.44) | 0.209 | 0.32 (-0.14 to 0.79)   | 4 (0.82)  | 7 (1.44)  | 0.57 (0.17-1.95)  | 0.373 | -0.61 (-1.94 to 0.71)  | 0.125 |
| Type 3c                      | 1 (0.11)  | 5 (0.52)  | 0.20 (0.02-1.74)  | 0.146 | -0.42 (-0.92 to 0.09)  | 3 (0.62)  | 1 (0.21)  | 3.01 (0.31-28.94) | 0.340 | 0.41 (-0.40 to 1.22)   | 0.090 |
| Type 4                       | 0 (0.00)  | 0 (0.00)  |                   |       |                        | 0 (0.00)  | 0 (0.00)  |                   |       |                        |       |
| Type 5                       | 1 (0.11)  | 5 (0.52)  | 0.20 (0.02-1.74)  | 0.146 | -0.41 (-0.92 to 0.09)  | 0 (0.00)  | 0 (0.00)  |                   |       |                        |       |
| Type 5a                      | 0 (0.00)  | 1 (0.10)  | 0.34 (0.01-8.34)  | 1.000 | -0.10 (-0.31 to 0.10)  | 0 (0.00)  | 0 (0.00)  |                   |       |                        |       |
| Type 5b                      | 1 (0.11)  | 4 (0.42)  | 0.25 (0.03-2.28)  | 0.221 | -0.31 (-0.77 to 0.15)  | 0 (0.00)  | 0 (0.00)  |                   |       |                        |       |
| Type 3 or 5                  | 16 (1.71) | 20 (2.09) | 0.81 (0.42-1.56)  | 0.532 | -0.38 (-1.61 to 0.85)  | 12 (2.47) | 11 (2.25) | 1.09 (0.48-2.48)  | 0.829 | 0.23 (-1.68 to 2.13)   | 0.576 |

*Abbreviations: BARC, Bleeding Academic Research Consortium; CI, confidence interval; MACCE, major adverse cardiac and cerebral events; MCB, major or clinically relevant non-major bleeding; NACE, net adverse clinical events; ST, stent thrombosis; TIA, transient ischemic attack.*

Nr of first events of each type (Kaplan-Meier failure %). Hazard ratio (95% CI) from Cox's time-to-first event analyses in ITT population. Continuity corrected risk ratios (95% CI) in case of zero events with Fisher's exact test p-value. Interaction p-value testing for modifying effect of Gender (males or females) on the hazard ratio scale.

¶includes undetermined Strokes.



**eFigure 1.** CONSORT Diagram of the MASTER DAPT Study

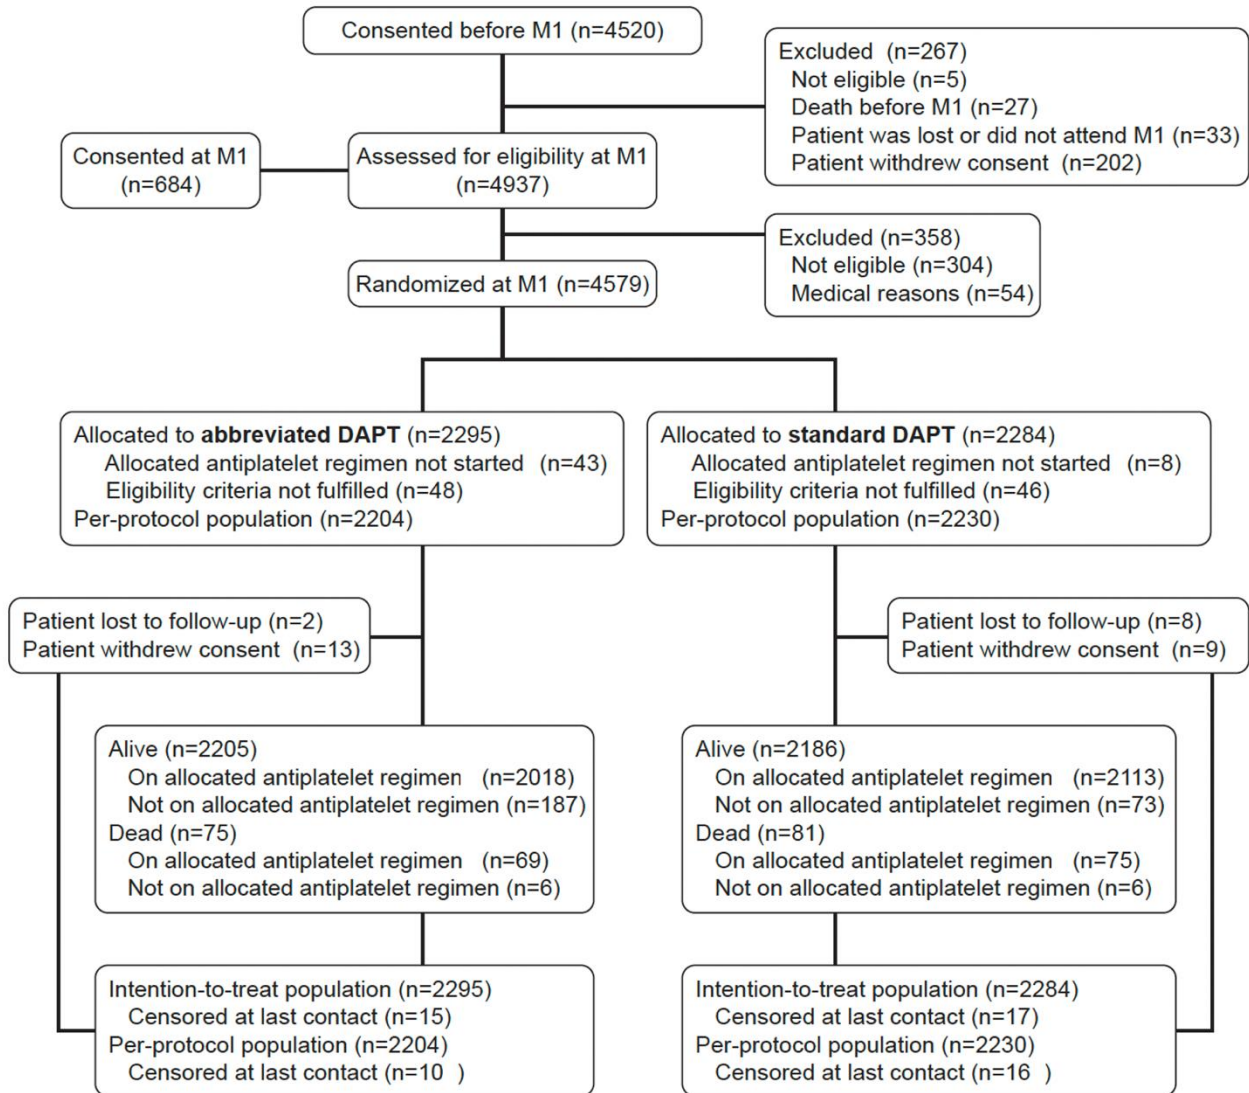

**eFigure 2.** Antiplatelet Therapy Since Randomization in Male Patients Without and With Clinical Indication for Oral Anticoagulation (OAC) Therapy

The charts illustrate the variations over time of APT stratified by randomly allocated APT regimen: abbreviated (left panels) versus standard DAPT (right panels). Dark blue denotes dual antiplatelet therapy, light blue denotes single antiplatelet therapy, red denotes no antiplatelet therapy, black denotes deceased patients, white denotes no information.

Abbreviations: DAPT, dual antiplatelet therapy; OAC, oral anticoagulation.

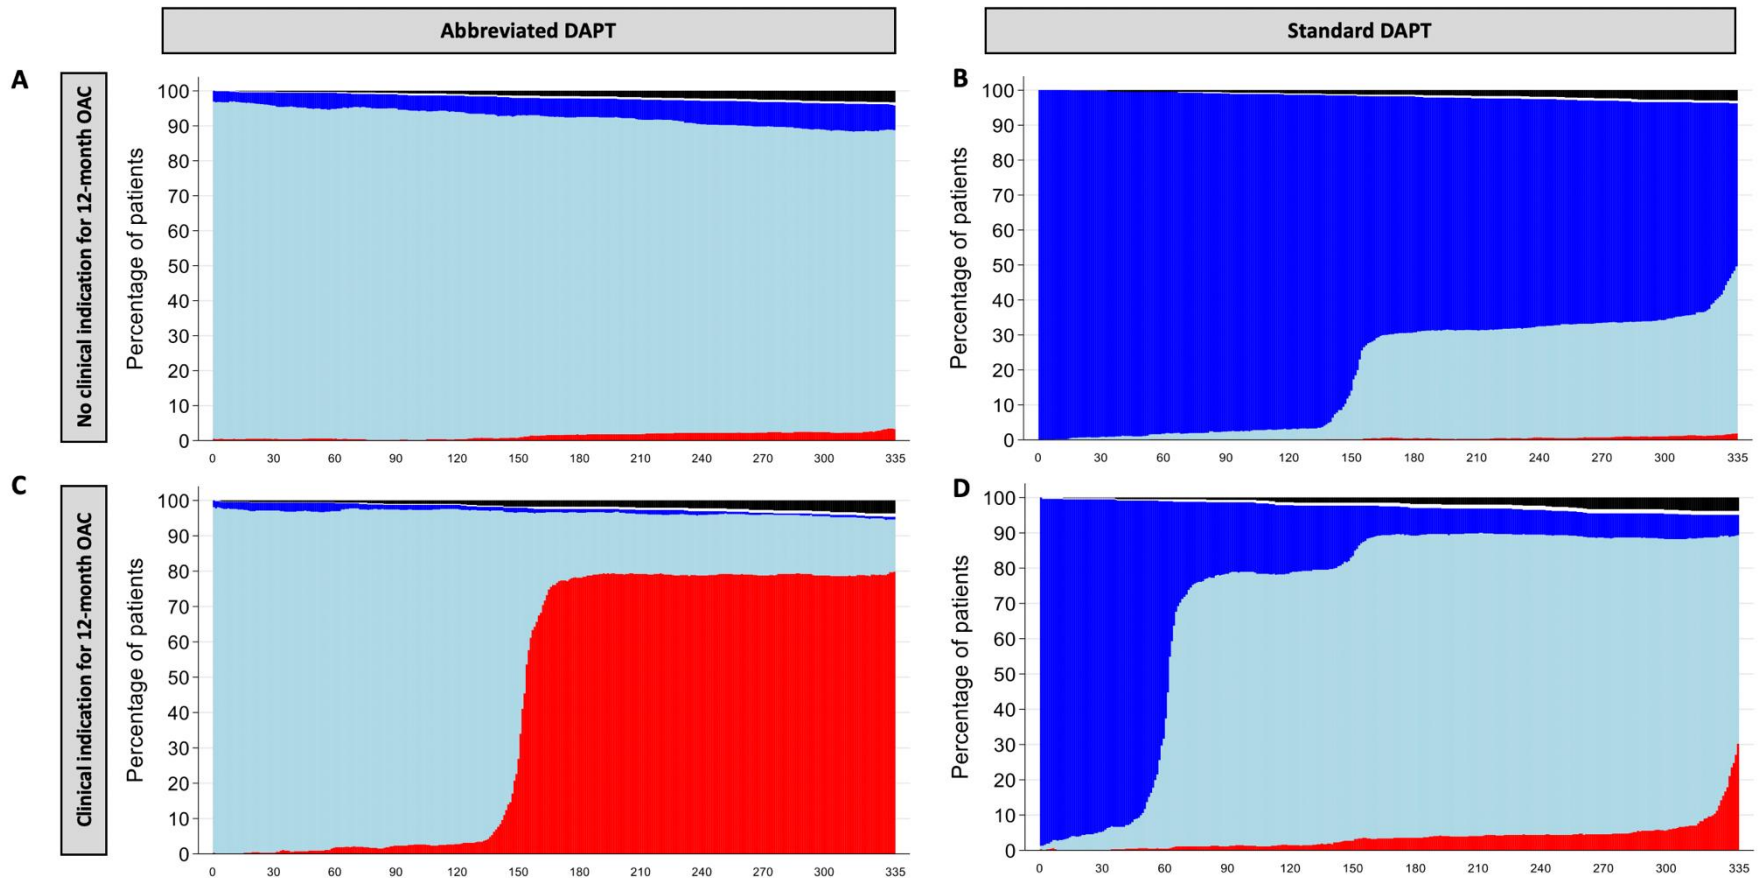

**eFigure 3.** Antiplatelet Therapy Since Randomization in Female Patients Without and With Clinical Indication for Oral Anticoagulation (OAC) Therapy

The charts illustrate the variations over time of APT stratified by randomly allocated APT regimen: abbreviated (left panels) versus standard DAPT (right panels). Dark blue denotes dual antiplatelet therapy, light blue denotes single antiplatelet therapy, red denotes no antiplatelet therapy, black denotes deceased patients, white denotes no information.

*Abbreviations: DAPT, dual antiplatelet therapy; OAC, oral anticoagulation.*

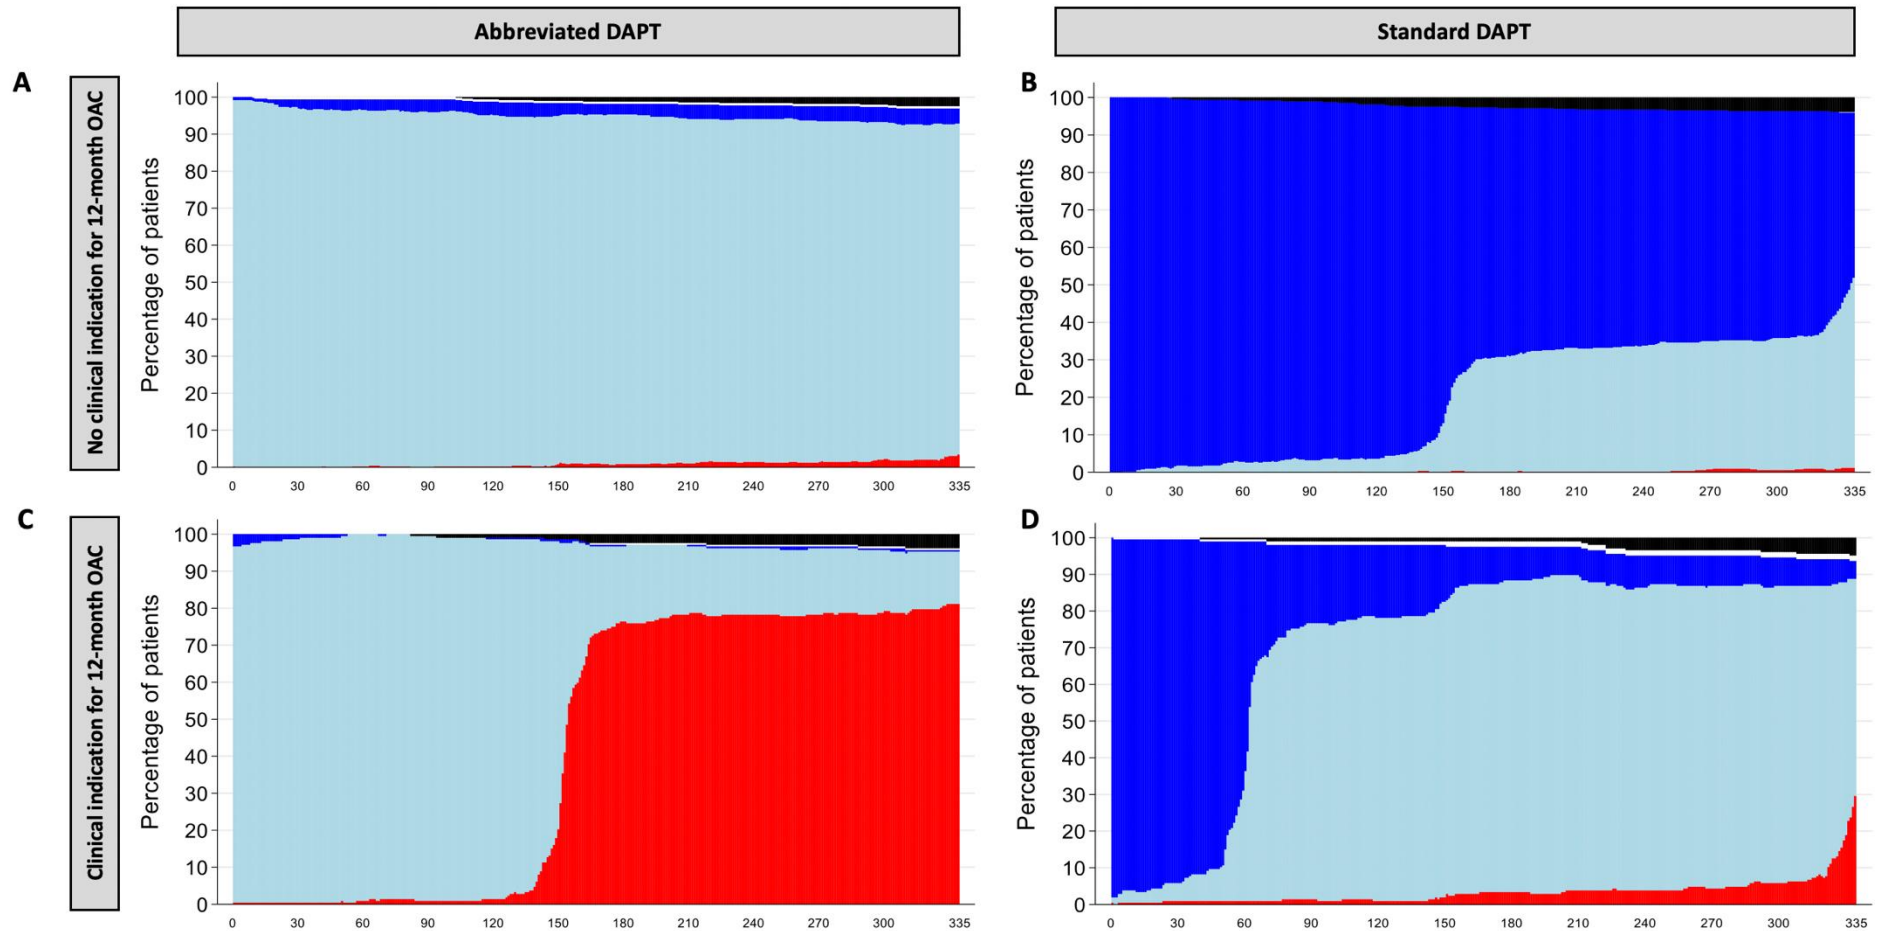

**eFigure 4.** Kaplan Meier Curves for All-Cause Mortality, Myocardial Infarction, Stroke, and BARC Type 3 or 5 Bleeding  
 Abbreviations: BARC, Bleeding Academic Research Consortium; CI, confidence interval; DAPT, dual antiplatelet therapy; HR, hazard ratio.

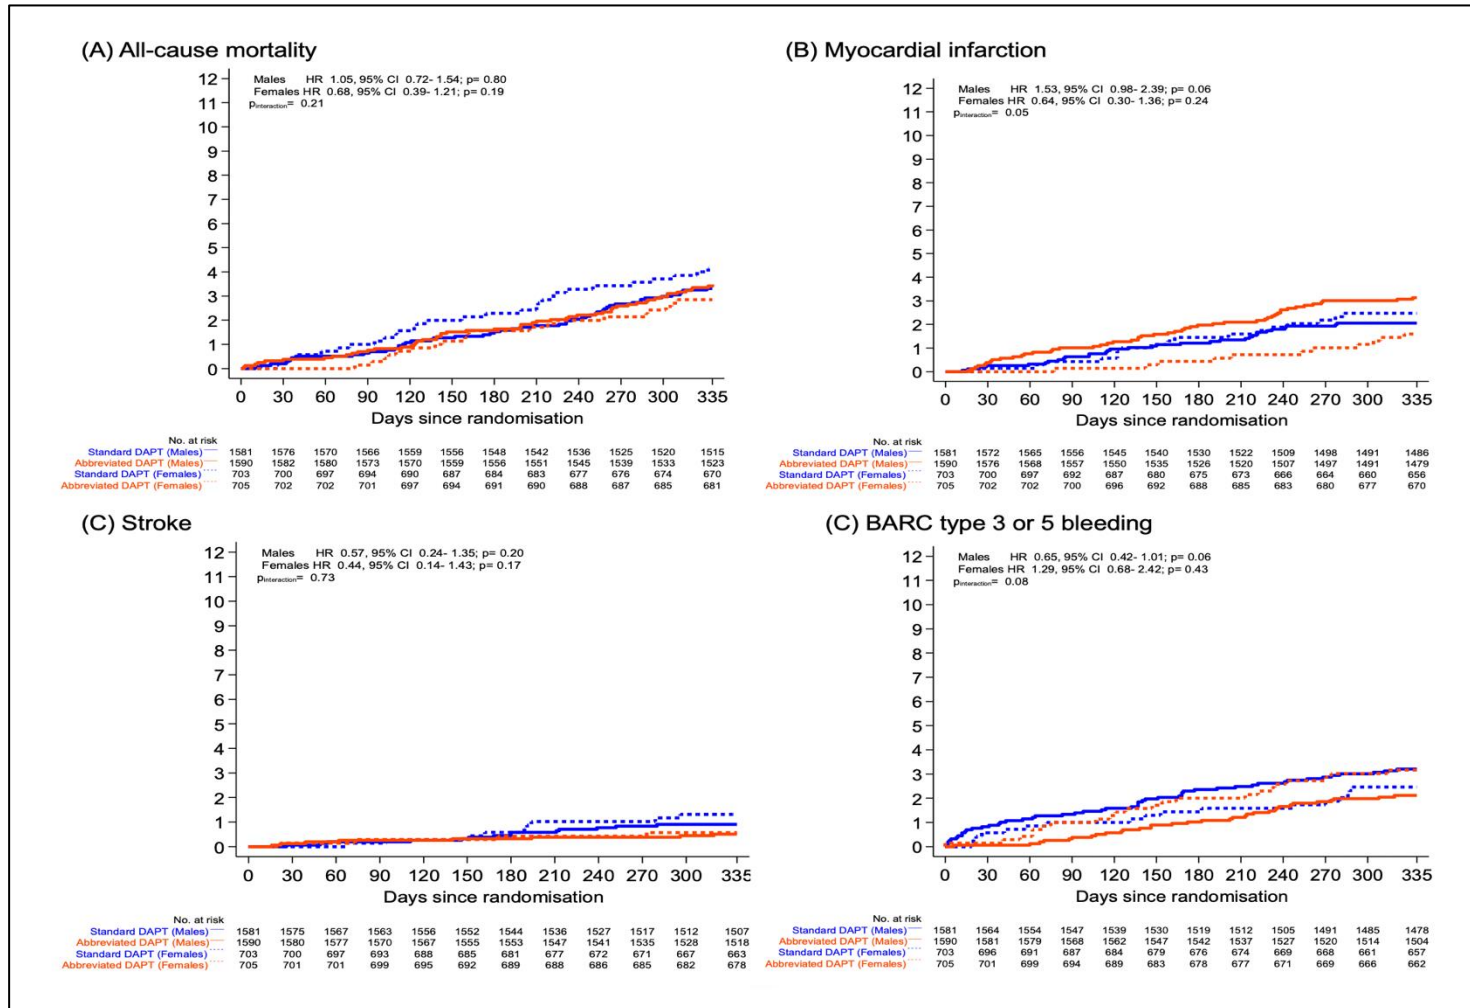

Supplement: jamacardiol-e234316-s002.pdf [file jamacardiol-e234316-s002.pdf]
