# Supplementary material
Source: PubMed Central journal article supplement (PMC10666042)
Supplement: jamacardiol-e234316-s003.pdf [file jamacardiol-e234316-s003.pdf]

\*Indicates required information. Only first name, last name, and suffix will appear in PubMed.

| <b>*Group Name(s): MASTER DAPT Investigators</b> |                   |                              |                  |             |                                          |                                                         |                                                                                            |
|--------------------------------------------------|-------------------|------------------------------|------------------|-------------|------------------------------------------|---------------------------------------------------------|--------------------------------------------------------------------------------------------|
| <b>*First Name and Middle Initial(s)</b>         | <b>*Last Name</b> | <b>*Suffix (eg, Jr, III)</b> | Academic Degrees | Institution | Location (city, state/province, country) | Role or Contribution, eg, chair, principal investigator | Group (if more than 1 Group listed in the byline) and/or Subgroup (eg, Steering Committee) |
| Marco                                            | Valgimigli        |                              |                  |             |                                          |                                                         |                                                                                            |
| Peter C.                                         | Smits             |                              |                  |             |                                          |                                                         |                                                                                            |
| G.A.                                             | Van Es            |                              |                  |             |                                          |                                                         |                                                                                            |
| G.B.W.E.                                         | Vos               |                              |                  |             |                                          |                                                         |                                                                                            |
| E.                                               | Spitzer           |                              |                  |             |                                          |                                                         |                                                                                            |
| Pascal                                           | Vrancks           |                              |                  |             |                                          |                                                         |                                                                                            |
| Bernard                                          | Chevalier         |                              |                  |             |                                          |                                                         |                                                                                            |
| Yukio                                            | Ozaki             |                              |                  |             |                                          |                                                         |                                                                                            |
| Marie-Claude                                     | Morice            |                              |                  |             |                                          |                                                         |                                                                                            |
| Stephan                                          | Windecker         |                              |                  |             |                                          |                                                         |                                                                                            |
| Yoshinobu                                        | Onuma             |                              |                  |             |                                          |                                                         |                                                                                            |
| Enrico                                           | Frigoli           |                              |                  |             |                                          |                                                         |                                                                                            |
| Andrè                                            | Frenk             |                              |                  |             |                                          |                                                         |                                                                                            |
| Peter C.                                         | Jüni              |                              |                  |             |                                          |                                                         |                                                                                            |
| Jan                                              | Tijssen           |                              |                  |             |                                          |                                                         |                                                                                            |
| D.                                               | Paunovic          |                              |                  |             |                                          |                                                         |                                                                                            |
| Mullasari S.                                     | Ajit              |                              |                  |             |                                          |                                                         |                                                                                            |
| Mirvat                                           | Alasnag           |                              |                  |             |                                          |                                                         |                                                                                            |
| Jozef                                            | Bartunek          |                              |                  |             |                                          |                                                         |                                                                                            |
| Antonio                                          | Colombo           |                              |                  |             |                                          |                                                         |                                                                                            |
| David                                            | Hildick-Smith     |                              |                  |             |                                          |                                                         |                                                                                            |
| Andrés                                           | Iñiguez           |                              |                  |             |                                          |                                                         |                                                                                            |
| Felix                                            | Mahfoud           |                              |                  |             |                                          |                                                         |                                                                                            |
| Ran                                              | Kornowski         |                              |                  |             |                                          |                                                         |                                                                                            |
| Maciej                                           | Lesiak            |                              |                  |             |                                          |                                                         |                                                                                            |
| Paul J.L.                                        | Ong               |                              |                  |             |                                          |                                                         |                                                                                            |
| Alfredo E.                                       | Rodriguez         |                              |                  |             |                                          |                                                         |                                                                                            |
| Marco                                            | Roffi             |                              |                  |             |                                          |                                                         |                                                                                            |

## Supplemental Online Content: Nonauthor Collaborators

\*Indicates required information. Only first name, last name, and suffix will appear in PubMed.

| *First Name and Middle Initial(s) | *Last Name        | *Suffix (eg, Jr, III) | Academic Degrees | Institution | Location (city, state/province, country) | Role or Contribution, eg, chair, principal investigator | Group (if more than 1 Group listed in the byline) and/or Subgroup (eg, Steering Committee) |
|-----------------------------------|-------------------|-----------------------|------------------|-------------|------------------------------------------|---------------------------------------------------------|--------------------------------------------------------------------------------------------|
| Carl                              | Schultz           |                       |                  |             |                                          |                                                         |                                                                                            |
| Goran                             | Stankovic         |                       |                  |             |                                          |                                                         |                                                                                            |
| Pim                               | Tonino            |                       |                  |             |                                          |                                                         |                                                                                            |
| Aris                              | Moschovitis       |                       |                  |             |                                          |                                                         |                                                                                            |
| Peep                              | Laanmets          |                       |                  |             |                                          |                                                         |                                                                                            |
| Michael                           | Donahue           |                       |                  |             |                                          |                                                         |                                                                                            |
| M.                                | Bertrand          |                       |                  |             |                                          |                                                         |                                                                                            |
| Stuart                            | Pocock            |                       |                  |             |                                          |                                                         |                                                                                            |
| Philip                            | Urban             |                       |                  |             |                                          |                                                         |                                                                                            |
| Sergio                            | Leonardi          |                       |                  |             |                                          |                                                         |                                                                                            |
| Claude                            | Hanet             |                       |                  |             |                                          |                                                         |                                                                                            |
| Renato                            | Lopes             |                       |                  |             |                                          |                                                         |                                                                                            |
| Eugene P.                         | McFadden          |                       |                  |             |                                          |                                                         |                                                                                            |
| Peter                             | Radke             |                       |                  |             |                                          |                                                         |                                                                                            |
| Risto O.                          | Roine             |                       |                  |             |                                          |                                                         |                                                                                            |
| Boudijn                           | Ladan             |                       |                  |             |                                          |                                                         |                                                                                            |
| Laura                             | van der Waal      |                       |                  |             |                                          |                                                         |                                                                                            |
| Yvonne                            | Engelbrecht       |                       |                  |             |                                          |                                                         |                                                                                            |
| Fred                              | Paddenburg        |                       |                  |             |                                          |                                                         |                                                                                            |
| Ben                               | Ren               |                       |                  |             |                                          |                                                         |                                                                                            |
| Ingrid                            | de Zwart          |                       |                  |             |                                          |                                                         |                                                                                            |
| Liliane                           | Elshout           |                       |                  |             |                                          |                                                         |                                                                                            |
| Judith                            | Jonk              |                       |                  |             |                                          |                                                         |                                                                                            |
| Tessa                             | Rademaker-Havinga |                       |                  |             |                                          |                                                         |                                                                                            |
| Ria                               | van Vliet         |                       |                  |             |                                          |                                                         |                                                                                            |
| Phani                             | Krishna Kondamudi |                       |                  |             |                                          |                                                         |                                                                                            |
| Laure                             | Morsiani          |                       |                  |             |                                          |                                                         |                                                                                            |
| Ute                               | Windhövel         |                       |                  |             |                                          |                                                         |                                                                                            |

## Supplemental Online Content: Nonauthor Collaborators

\*Indicates required information. Only first name, last name, and suffix will appear in PubMed.

| *First Name and Middle Initial(s) | *Last Name         | *Suffix (eg, Jr, III) | Academic Degrees | Institution | Location (city, state/province, country) | Role or Contribution, eg, chair, principal investigator | Group (if more than 1 Group listed in the byline) and/or Subgroup (eg, Steering Committee) |
|-----------------------------------|--------------------|-----------------------|------------------|-------------|------------------------------------------|---------------------------------------------------------|--------------------------------------------------------------------------------------------|
| Anita                             | van der Wal        |                       |                  |             |                                          |                                                         |                                                                                            |
| Chantal                           | Bakker             |                       |                  |             |                                          |                                                         |                                                                                            |
| Kazuhiro                          | Minagawa           |                       |                  |             |                                          |                                                         |                                                                                            |
| Juan                              | Mieres             |                       |                  |             |                                          |                                                         |                                                                                            |
| Fernando                          | Cura               |                       |                  |             |                                          |                                                         |                                                                                            |
| Carlos                            | Fernandez-Pereira  |                       |                  |             |                                          |                                                         |                                                                                            |
| Astin                             | Lee                |                       |                  |             |                                          |                                                         |                                                                                            |
| Nigel                             | Jepson             |                       |                  |             |                                          |                                                         |                                                                                            |
| Robert                            | Whitbourn          |                       |                  |             |                                          |                                                         |                                                                                            |
| Owen                              | Christopher Raffel |                       |                  |             |                                          |                                                         |                                                                                            |
| Kurt                              | Huber              |                       |                  |             |                                          |                                                         |                                                                                            |
| Franz                             | Weidinger          |                       |                  |             |                                          |                                                         |                                                                                            |
| Fazila-Tun-Nesa                   | Malik Hasselt      |                       |                  |             |                                          |                                                         |                                                                                            |
| Jessa                             | Ziekenhuis         |                       |                  |             |                                          |                                                         |                                                                                            |
| Imelda                            | Ziekenhuis         |                       |                  |             |                                          |                                                         |                                                                                            |
| Willem                            | Dewilde            |                       |                  |             |                                          |                                                         |                                                                                            |
| Adel                              | Aminian            |                       |                  |             |                                          |                                                         |                                                                                            |
| Emanuele                          | Aalst              |                       |                  |             |                                          |                                                         |                                                                                            |
| Suzanne                           | Pourbaix           |                       |                  |             |                                          |                                                         |                                                                                            |
| Panagiotis                        | Xaplanteris        |                       |                  |             |                                          |                                                         |                                                                                            |
| Vasil                             | Velchev            |                       |                  |             |                                          |                                                         |                                                                                            |
| Dimitar                           | Karageorgiev       |                       |                  |             |                                          |                                                         |                                                                                            |
| Hristo                            | Mateev             |                       |                  |             |                                          |                                                         |                                                                                            |
| Valeri                            | Gelev              |                       |                  |             |                                          |                                                         |                                                                                            |
| Petr                              | Kala               |                       |                  |             |                                          |                                                         |                                                                                            |
| Martin                            | Mates              |                       |                  |             |                                          |                                                         |                                                                                            |
| Henning                           | Kelbæk             |                       |                  |             |                                          |                                                         |                                                                                            |
| Thomas                            | Hovasse            |                       |                  |             |                                          |                                                         |                                                                                            |

## Supplemental Online Content: Nonauthor Collaborators

\*Indicates required information. Only first name, last name, and suffix will appear in PubMed.

| *First Name and Middle Initial(s) | *Last Name   | *Suffix (eg, Jr, III) | Academic Degrees | Institution | Location (city, state/province, country) | Role or Contribution, eg, chair, principal investigator | Group (if more than 1 Group listed in the byline) and/or Subgroup (eg, Steering Committee) |
|-----------------------------------|--------------|-----------------------|------------------|-------------|------------------------------------------|---------------------------------------------------------|--------------------------------------------------------------------------------------------|
| Laurent                           | Delorme      |                       |                  |             |                                          |                                                         |                                                                                            |
| Thomas                            | Cuisset      |                       |                  |             |                                          |                                                         |                                                                                            |
| Loïc                              | Belle        |                       |                  |             |                                          |                                                         |                                                                                            |
| Farzin                            | Beygui       |                       |                  |             |                                          |                                                         |                                                                                            |
| Christophe                        | Piot         |                       |                  |             |                                          |                                                         |                                                                                            |
| Jean François                     | Morelle      |                       |                  |             |                                          |                                                         |                                                                                            |
| Rene                              | Koning       |                       |                  |             |                                          |                                                         |                                                                                            |
| Mathieu                           | Valla        |                       |                  |             |                                          |                                                         |                                                                                            |
| Philippe                          | Brunel       |                       |                  |             |                                          |                                                         |                                                                                            |
| Guillaume                         | Cayla        |                       |                  |             |                                          |                                                         |                                                                                            |
| Emmanuel                          | Teiger       |                       |                  |             |                                          |                                                         |                                                                                            |
| Gilles                            | Montalescot  |                       |                  |             |                                          |                                                         |                                                                                            |
| Christian                         | Spaulding    |                       |                  |             |                                          |                                                         |                                                                                            |
| Phillipe                          | Guyon        |                       |                  |             |                                          |                                                         |                                                                                            |
| Pyxaras                           | Stylianos    |                       |                  |             |                                          |                                                         |                                                                                            |
| Bela                              | Merkely      |                       |                  |             |                                          |                                                         |                                                                                            |
| Imre                              | Ungi         |                       |                  |             |                                          |                                                         |                                                                                            |
| Rajpal K                          | Abhaichand   |                       |                  |             |                                          |                                                         |                                                                                            |
| Atul Damodar                      | Abhyankar    |                       |                  |             |                                          |                                                         |                                                                                            |
| Gunasekaran                       | Sengottuvelu |                       |                  |             |                                          |                                                         |                                                                                            |
| Halabi                            | Majdi        |                       |                  |             |                                          |                                                         |                                                                                            |
| Ariel                             | Roguin       |                       |                  |             |                                          |                                                         |                                                                                            |
| Yair                              | Feld         |                       |                  |             |                                          |                                                         |                                                                                            |
| Chaim                             | Lotan        |                       |                  |             |                                          |                                                         |                                                                                            |
| Stefano                           | Garducci     |                       |                  |             |                                          |                                                         |                                                                                            |
| Bernhard                          | Reimers      |                       |                  |             |                                          |                                                         |                                                                                            |
| Gennaro                           | Sardella     |                       |                  |             |                                          |                                                         |                                                                                            |
| Antonio                           | Milan        |                       |                  |             |                                          |                                                         |                                                                                            |
| Alaide                            | Chieffo      |                       |                  |             |                                          |                                                         |                                                                                            |
| Corrado                           | Tamburino    |                       |                  |             |                                          |                                                         |                                                                                            |

## Supplemental Online Content: Nonauthor Collaborators

\*Indicates required information. Only first name, last name, and suffix will appear in PubMed.

| *First Name and Middle Initial(s) | *Last Name     | *Suffix (eg, Jr, III) | Academic Degrees | Institution | Location (city, state/province, country) | Role or Contribution, eg, chair, principal investigator | Group (if more than 1 Group listed in the byline) and/or Subgroup (eg, Steering Committee) |
|-----------------------------------|----------------|-----------------------|------------------|-------------|------------------------------------------|---------------------------------------------------------|--------------------------------------------------------------------------------------------|
| Giuseppe                          | Andò           |                       |                  |             |                                          |                                                         |                                                                                            |
| Luca                              | Testa          |                       |                  |             |                                          |                                                         |                                                                                            |
| Maurizio                          | Di Biasi       |                       |                  |             |                                          |                                                         |                                                                                            |
| Alessandro                        | Sciahbasi      |                       |                  |             |                                          |                                                         |                                                                                            |
| Paolo                             | Calabro        |                       |                  |             |                                          |                                                         |                                                                                            |
| Gianluigi                         | Minervini      |                       |                  |             |                                          |                                                         |                                                                                            |
| Bruno                             | Loi            |                       |                  |             |                                          |                                                         |                                                                                            |
| Franco                            | Fabbicchi      |                       |                  |             |                                          |                                                         |                                                                                            |
| Jacopo                            | Oreglia        |                       |                  |             |                                          |                                                         |                                                                                            |
| Paolo                             | Sganzerla      |                       |                  |             |                                          |                                                         |                                                                                            |
| Yukio                             | Ozaki          |                       |                  |             |                                          |                                                         |                                                                                            |
| Kenji                             | Ando           |                       |                  |             |                                          |                                                         |                                                                                            |
| Yoshiharu                         | Higuchi        |                       |                  |             |                                          |                                                         |                                                                                            |
| Mamoru                            | Nanasato       |                       |                  |             |                                          |                                                         |                                                                                            |
| Yuki                              | Ishibashi      |                       |                  |             |                                          |                                                         |                                                                                            |
| Hitoshi                           | Matsuo         |                       |                  |             |                                          |                                                         |                                                                                            |
| Ruka                              | Yoshida        |                       |                  |             |                                          |                                                         |                                                                                            |
| Kiyokazu                          | Shimizu        |                       |                  |             |                                          |                                                         |                                                                                            |
| Haruo                             | Kamiya         |                       |                  |             |                                          |                                                         |                                                                                            |
| Nobuyuki                          | Komiyama       |                       |                  |             |                                          |                                                         |                                                                                            |
| Tetsuya                           | Amano          |                       |                  |             |                                          |                                                         |                                                                                            |
| Toyoaki                           | Murohara       |                       |                  |             |                                          |                                                         |                                                                                            |
| Seiji                             | Yamazaki       |                       |                  |             |                                          |                                                         |                                                                                            |
| Husam                             | Noor           |                       |                  |             |                                          |                                                         |                                                                                            |
| Sasko                             | Kedev          |                       |                  |             |                                          |                                                         |                                                                                            |
| Jakub                             | Podolec        |                       |                  |             |                                          |                                                         |                                                                                            |
| Krzysztof                         | Reszuch        |                       |                  |             |                                          |                                                         |                                                                                            |
| Adrian                            | Wlodarczak     |                       |                  |             |                                          |                                                         |                                                                                            |
| Dariusz                           | Dudek          |                       |                  |             |                                          |                                                         |                                                                                            |
| Pedro                             | Canas da Silva |                       |                  |             |                                          |                                                         |                                                                                            |

## Supplemental Online Content: Nonauthor Collaborators

\*Indicates required information. Only first name, last name, and suffix will appear in PubMed.

| *First Name and Middle Initial(s) | *Last Name        | *Suffix (eg, Jr, III) | Academic Degrees | Institution | Location (city, state/province, country) | Role or Contribution, eg, chair, principal investigator | Group (if more than 1 Group listed in the byline) and/or Subgroup (eg, Steering Committee) |
|-----------------------------------|-------------------|-----------------------|------------------|-------------|------------------------------------------|---------------------------------------------------------|--------------------------------------------------------------------------------------------|
| Ljupco                            | Mangovski         |                       |                  |             |                                          |                                                         |                                                                                            |
| Dragan                            | Topic             |                       |                  |             |                                          |                                                         |                                                                                            |
| Dragan                            | Debeijacki        |                       |                  |             |                                          |                                                         |                                                                                            |
| Paul                              | Ong Jau Lueng     |                       |                  |             |                                          |                                                         |                                                                                            |
| Syed                              | Saqib Imran       |                       |                  |             |                                          |                                                         |                                                                                            |
| Park                              | Seung-Jung        |                       |                  |             |                                          |                                                         |                                                                                            |
| Jose Francisco                    | Diaz Fernandez    |                       |                  |             |                                          |                                                         |                                                                                            |
| Brudo                             | Garcia Del Blanco |                       |                  |             |                                          |                                                         |                                                                                            |
| Vicente                           | Mainar            |                       |                  |             |                                          |                                                         |                                                                                            |
| Iván                              | Gómez-Blázquez    |                       |                  |             |                                          |                                                         |                                                                                            |
| Eduardo                           | Pinar             |                       |                  |             |                                          |                                                         |                                                                                            |
| Javier                            | Escaned Barbosa   |                       |                  |             |                                          |                                                         |                                                                                            |
| Joan                              | Antoni            |                       |                  |             |                                          |                                                         |                                                                                            |
| Fermin                            | Sainz             |                       |                  |             |                                          |                                                         |                                                                                            |
| Javier                            | Goicolea          |                       |                  |             |                                          |                                                         |                                                                                            |
| Ole                               | Fröbert           |                       |                  |             |                                          |                                                         |                                                                                            |
| Robert                            | Kastberg          |                       |                  |             |                                          |                                                         |                                                                                            |
| Gregor                            | Leibundgut        |                       |                  |             |                                          |                                                         |                                                                                            |
| Giovanni                          | Pedrazzini        |                       |                  |             |                                          |                                                         |                                                                                            |
| Ali                               | Garachemani       |                       |                  |             |                                          |                                                         |                                                                                            |
| Patrick                           | Siegrist          |                       |                  |             |                                          |                                                         |                                                                                            |
| Stephane                          | Cook              |                       |                  |             |                                          |                                                         |                                                                                            |
| Al                                | Mafragi           |                       |                  |             |                                          |                                                         |                                                                                            |
| Gillian Aj                        | Jessurun          |                       |                  |             |                                          |                                                         |                                                                                            |
| Willem Theodoor                   | Ruifrok           |                       |                  |             |                                          |                                                         |                                                                                            |
| Peter                             | Danse             |                       |                  |             |                                          |                                                         |                                                                                            |

## Supplemental Online Content: Nonauthor Collaborators

\*Indicates required information. Only first name, last name, and suffix will appear in PubMed.

| *First Name and Middle Initial(s) | *Last Name   | *Suffix (eg, Jr, III) | Academic Degrees | Institution | Location (city, state/province, country) | Role or Contribution, eg, chair, principal investigator | Group (if more than 1 Group listed in the byline) and/or Subgroup (eg, Steering Committee) |
|-----------------------------------|--------------|-----------------------|------------------|-------------|------------------------------------------|---------------------------------------------------------|--------------------------------------------------------------------------------------------|
| Jawed                             | Polad        |                       |                  |             |                                          |                                                         |                                                                                            |
| Floris                            | Kauer        |                       |                  |             |                                          |                                                         |                                                                                            |
| Clemens                           | von Birgelen |                       |                  |             |                                          |                                                         |                                                                                            |
| Jurrien                           | Ten Berg     |                       |                  |             |                                          |                                                         |                                                                                            |
| Sander                            | Ijsselmuiden |                       |                  |             |                                          |                                                         |                                                                                            |
| Samer                             | Somi         |                       |                  |             |                                          |                                                         |                                                                                            |
| Tom                               | Johnson      |                       |                  |             |                                          |                                                         |                                                                                            |
| Helen                             | Routledge    |                       |                  |             |                                          |                                                         |                                                                                            |
| Jehangir                          | Din          |                       |                  |             |                                          |                                                         |                                                                                            |
| Shahzad                           | Munir        |                       |                  |             |                                          |                                                         |                                                                                            |
| John                              | McDonald     |                       |                  |             |                                          |                                                         |                                                                                            |
| Neville                           | Kikreja      |                       |                  |             |                                          |                                                         |                                                                                            |
| Mamas                             | Mamas        |                       |                  |             |                                          |                                                         |                                                                                            |
| Rajiv                             | Das          |                       |                  |             |                                          |                                                         |                                                                                            |
| Hussain                           | Contractor   |                       |                  |             |                                          |                                                         |                                                                                            |
| Aaron                             | Peace        |                       |                  |             |                                          |                                                         |                                                                                            |
| Rupert                            | Williams     |                       |                  |             |                                          |                                                         |                                                                                            |
| Nguyen                            | Ngoc Quang   |                       |                  |             |                                          |                                                         |                                                                                            |
