# Supplementary material
Source: PubMed Central journal article supplement (PMC10666042)
Supplement: jamacardiol-e234316-s004.pdf [file jamacardiol-e234316-s004.pdf]

## Data Sharing Statement

Landi. Abbreviated or Standard Dual Antiplatelet Therapy by Sex in Patients at High Bleeding Risk. *JAMA Cardiol.* Published November 22, 2023. doi:10.1001/jamacardio.2023.4316

### Data

**Data available:** No

### Additional Information

**Explanation for why data not available:** The data underlying this article will be shared on reasonable request to the corresponding author.
